# Supplementary material for: Economic damage and spill-overs from a tropical cyclone
Source: Copernicus journal article supplement (doi:10.5194/nhess-2017-440), 2018-01-05
Supplement: Supplementary file 1 [file nhess-2017-440-supplement.pdf]

# SUPPLEMENTARY INFORMATION

## **Economic damage and spill-overs from a tropical cyclone**

### **Table of contents**

|                                                                          |    |
|--------------------------------------------------------------------------|----|
| SI 1: Sector classification used in this study.....                      | 2  |
| SI 2: Estimation of gamma matrix for Tropical Cyclone Debbie.....        | 3  |
| SI 3: Employment and value added effects for a range of thresholds ..... | 8  |
| SI 4: Raw data for production layer decomposition graphs.....            | 18 |
| SI 5: Underlying raw data for main text’s Figure 3. ....                 | 19 |
| SI 6: References .....                                                   | 34 |

## **SI 1: Sector classification used in this study**

1. Sheep
2. Grains
3. Beef cattle
4. Dairy cattle and pigs
5. Other agriculture
6. Sugar cane growing
7. Forestry and fishing
8. Coal, oil and gas
9. Non-ferrous metal ores
10. Other mining
11. Food manufacturing
12. Textiles, clothing and footwear
13. Wood and paper manufacturing
14. Chemicals, petroleum and coal products
15. Non-metallic mineral products
16. Metals, metal products
17. Machinery appliances and equipment
18. Miscellaneous manufacturing
19. Electricity supply, gas and water
20. Residential building construction
21. Other construction
22. Trade
23. Accommodation, cafes and restaurants
24. Road transport
25. Rail and pipeline transport
26. Other transport
27. Communication services
28. Finance, property and business services
29. Ownership of dwellings
30. Government administration and defence
31. Education
32. Health and community services
33. Cultural and recreational services
34. Personal and other services

## SI 2: Estimation of gamma matrix for Tropical Cyclone Debbie

Table SI 2.1 Total output (million dollars) by region and sector for 2016.

|                                            | Rest of NSW | NSW-Richmond-Tweed | VIC   | QLD-Brisbane | QLD-Wide Bay Burnett | QLD-Darling Downs | QLD-South West | QLD-Fitzroy | QLD-Central West | QLD-Mackay | QLD-Northern | QLD-Far North | QLD-North West | SA    | WA    | TAS  | ACT  | NT   |
|--------------------------------------------|-------------|--------------------|-------|--------------|----------------------|-------------------|----------------|-------------|------------------|------------|--------------|---------------|----------------|-------|-------|------|------|------|
| 1 Sheep                                    | 482         | 171                | 563   | 105          | 1                    | 503               | 7              | 1           | 20               | 0          | 0            | 0             | 0              | 377   | 547   | 153  | 6    | 19   |
| 2 Grains                                   | 2117        | 715                | 1448  | 204          | 54                   | 852               | 18             | 92          | 0                | 37         | 8            | 4             | 0              | 2265  | 5181  | 306  | 1    | 12   |
| 3 Beef cattle                              | 1820        | 185                | 1097  | 1384         | 243                  | 2093              | 35             | 194         | 134              | 105        | 73           | 58            | 69             | 498   | 584   | 138  | 85   | 176  |
| 4 Dairy cattle and pigs                    | 315         | 356                | 3260  | 180          | 239                  | 51                | 25             | 3           | 0                | 4          | 3            | 17            | 0              | 350   | 290   | 546  | 7    | 29   |
| 5 Other agriculture                        | 1535        | 1877               | 3228  | 1277         | 456                  | 962               | 102            | 28          | 32               | 51         | 102          | 358           | 158            | 1929  | 1488  | 866  | 6    | 649  |
| 6 Sugar cane growing                       | 33          | 50                 | 14    | 78           | 423                  | 0                 | 0              | 0           | 0                | 292        | 391          | 121           | 0              | 7     | 10    | 3    | 0    | 9    |
| 7 Forestry and fishing                     | 1680        | 145                | 1061  | 241          | 272                  | 18                | 6              | 21          | 5                | 27         | 54           | 116           | 5              | 724   | 756   | 558  | 119  | 132  |
| 8 Coal, oil and gas                        | 18335       | 170                | 4862  | 8301         | 280                  | 3289              | 8              | 3581        | 9                | 4555       | 406          | 79            | 8              | 2411  | 19739 | 120  | 60   | 422  |
| 9 Non-ferrous metal ores                   | 3496        | 199                | 2346  | 356          | 61                   | 10                | 3              | 77          | 2                | 13         | 277          | 557           | 587            | 2182  | 18678 | 288  | 250  | 1955 |
| 10 Other mining                            | 2936        | 213                | 3179  | 1301         | 167                  | 135               | 19             | 359         | 3                | 388        | 224          | 186           | 61             | 1891  | 37924 | 285  | 175  | 829  |
| 11 Food manufacturing                      | 1568        | 529                | 3888  | 1316         | 2430                 | 8                 | 608            | 38          | 6                | 463        | 553          | 325           | 32             | 1211  | 753   | 401  | 6    | 107  |
| 12 Textiles, clothing and footwear         | 4100        | 338                | 4253  | 410          | 33                   | 40                | 4              | 32          | 0                | 30         | 42           | 44            | 5              | 981   | 1047  | 217  | 371  | 232  |
| 13 Wood and paper manufacturing            | 6877        | 268                | 6604  | 1740         | 359                  | 70                | 12             | 48          | 3                | 51         | 91           | 96            | 7              | 1872  | 1712  | 363  | 326  | 194  |
| 14 Chemicals, petroleum and coal products  | 20241       | 325                | 19650 | 2027         | 96                   | 52                | 5              | 430         | 3                | 122        | 228          | 72            | 41             | 3340  | 7386  | 413  | 323  | 235  |
| 15 Non-metallic mineral products           | 4295        | 324                | 3314  | 744          | 62                   | 15                | 3              | 261         | 1                | 50         | 80           | 71            | 10             | 1200  | 1972  | 332  | 529  | 380  |
| 16 Metals, metal products                  | 16797       | 285                | 13849 | 2015         | 281                  | 88                | 11             | 2312        | 3                | 98         | 478          | 207           | 382            | 4561  | 11543 | 660  | 308  | 766  |
| 17 Machinery appliances and equipment      | 25686       | 367                | 28242 | 2517         | 239                  | 169               | 14             | 137         | 5                | 327        | 215          | 233           | 22             | 8067  | 12049 | 665  | 607  | 535  |
| 18 Miscellaneous manufacturing             | 15471       | 561                | 12013 | 712          | 42                   | 28                | 3              | 72          | 5                | 56         | 57           | 111           | 15             | 3983  | 4299  | 413  | 1095 | 491  |
| 19 Electricity supply, gas and water       | 16753       | 350                | 13597 | 3116         | 840                  | 117               | 20             | 732         | 8                | 114        | 267          | 268           | 38             | 4653  | 5438  | 901  | 693  | 442  |
| 20 Residential building construction       | 22870       | 577                | 21935 | 3195         | 299                  | 120               | 21             | 285         | 9                | 271        | 358          | 492           | 32             | 4571  | 9272  | 557  | 981  | 649  |
| 21 Other construction                      | 46476       | 1224               | 41633 | 6336         | 623                  | 464               | 77             | 766         | 79               | 479        | 623          | 702           | 133            | 9798  | 26827 | 1171 | 1943 | 1606 |
| 22 Trade                                   | 56892       | 1565               | 44059 | 11426        | 1280                 | 596               | 121            | 799         | 22               | 761        | 1166         | 1152          | 123            | 11817 | 23868 | 1989 | 2383 | 1380 |
| 23 Accommodation, cafes and restaurants    | 15824       | 572                | 9891  | 3102         | 383                  | 138               | 30             | 305         | 15               | 345        | 394          | 575           | 53             | 3272  | 4231  | 565  | 783  | 422  |
| 24 Road transport                          | 10102       | 348                | 8775  | 2279         | 290                  | 183               | 30             | 232         | 8                | 198        | 283          | 274           | 30             | 2388  | 4457  | 592  | 457  | 360  |
| 25 Rail and pipeline transport             | 5538        | 127                | 2166  | 1288         | 52                   | 81                | 12             | 363         | 27               | 378        | 227          | 60            | 53             | 686   | 1059  | 160  | 194  | 114  |
| 26 Other transport                         | 20098       | 298                | 15158 | 2544         | 151                  | 67                | 16             | 341         | 8                | 427        | 421          | 655           | 34             | 3210  | 7235  | 611  | 620  | 628  |
| 27 Communication services                  | 30586       | 604                | 20102 | 2330         | 157                  | 82                | 11             | 98          | 5                | 72         | 194          | 158           | 17             | 3843  | 4453  | 663  | 1585 | 538  |
| 28 Finance, property and business services | 72016       | 1486               | 49595 | 12075        | 667                  | 310               | 56             | 758         | 7                | 449        | 908          | 1087          | 46             | 11730 | 19781 | 2199 | 4138 | 1746 |
| 29 Ownership of dwellings                  | 14352       | 504                | 8434  | 5890         | 698                  | 294               | 43             | 267         | 3                | 219        | 499          | 458           | 25             | 2363  | 3758  | 527  | 618  | 626  |
| 30 Government administration and defence   | 27232       | 551                | 15664 | 4492         | 325                  | 258               | 61             | 340         | 36               | 113        | 571          | 441           | 52             | 5382  | 7299  | 1206 | 8003 | 1639 |
| 31 Education                               | 29546       | 777                | 21887 | 3110         | 389                  | 210               | 33             | 388         | 14               | 184        | 374          | 439           | 56             | 6273  | 8724  | 1193 | 1884 | 829  |
| 32 Health and community services           | 27389       | 817                | 19248 | 4142         | 556                  | 282               | 32             | 357         | 12               | 196        | 454          | 486           | 49             | 6227  | 7768  | 1402 | 1228 | 831  |
| 33 Cultural and recreational services      | 7864        | 413                | 6276  | 1486         | 81                   | 55                | 8              | 96          | 9                | 57         | 138          | 182           | 16             | 1783  | 2243  | 236  | 712  | 375  |
| 34 Personal and other services             | 5358        | 196                | 3864  | 1543         | 164                  | 90                | 14             | 144         | 6                | 101        | 167          | 198           | 24             | 1171  | 1494  | 143  | 292  | 275  |

Table SI 2.2 Summary of Impact information.

| Aspect            | Region                           | Sectors                                      | Example impact                                                                                                                                                                                                                                                                                                                                                                                                                                                             | Reference                                                                            |
|-------------------|----------------------------------|----------------------------------------------|----------------------------------------------------------------------------------------------------------------------------------------------------------------------------------------------------------------------------------------------------------------------------------------------------------------------------------------------------------------------------------------------------------------------------------------------------------------------------|--------------------------------------------------------------------------------------|
| Coal exports      | All QLD                          | Coal, oil and gas                            | "Queensland coal exports may have taken a \$1.5 billion hit from Cyclone Debbie as more than 22 mines were forced to halt production while roads and ports were shut."                                                                                                                                                                                                                                                                                                     | (John McCarthy and Vogler, 2017)                                                     |
| Coal exports      | All QLD                          | Coal, oil and gas                            | "Landslides caused by Debbie have halted operations on the busiest rail line connecting coking coal mines in Queensland to ports, and rail operator Aurizon said it would take about five weeks to repair. BHP Billiton, the world's biggest shipper of coking coal, said it won't meet its export commitments from its mines in Queensland's Bowen Basin - among five miners in the region to declare force majeure, a clause typically invoked after natural disasters." | (Serapio, 2017)                                                                      |
| Coal exports      | Parts of QLD-Fitzroy, QLD-Mackay | Coal, oil and gas                            | Mining operator Aurizon said it expected to lose up to \$115 million as a result of Cyclone Debbie influencing mines at Blackwater, Moura, Goonyella, and Newlands.                                                                                                                                                                                                                                                                                                        | (O'Brien, 2017) (Public-Private Partnership in Infrastructure Resource Centre, 2016) |
| Business Flooding | NSW Richmond & Tweed             | Accommodation, Cafes and Restaurants, Trade, | "This is a community of at least 50,000 people and when you go for a drive, come back and six months you'll see 50 to 80 per cent of these businesses not open."                                                                                                                                                                                                                                                                                                           | (Gleeson, April 3, 2017 1:36pm)                                                      |
| Business Flooding | NSW Richmond & Tweed             | Accommodation, Cafes and Restaurants, Trade, | "Half of the small businesses that make up the four streets of the Lismore central business district may have to close up shop — for good."                                                                                                                                                                                                                                                                                                                                | (Hansen, April 9, 2017 12:00am)                                                      |
| Tourism impacts   | QLD - Mackay                     | Multiple                                     | 1.3 million visitors spending some \$967 million (1). Debbie has been confirmed as causing 'catastrophic damage and is expected to be worse with businesses on Hamilton Island questioning whether rebuilding is the best option. Cyclone Yasi cost tourism 400 million (2) indicating \$200million an approximation for Debbie.                                                                                                                                           | (1) (Tourism Research Australia, 2016) (2) (Flaherty, 2017)                          |
| Sugar Cane        | QLD- Mackay                      | Sugar cane growing                           | "The sugar cane industry has forecast a \$150m blow, and the Bowen region's \$450m-a-year horticulture industry will also suffer heavy losses that could cause the price of household staples such as tomatoes to rise later in the year."                                                                                                                                                                                                                                 | (Robertson, 2017)                                                                    |
| Sugar Cane        | QLD- Mackay                      | Sugar cane growing                           | "Damage to Queensland's sugar industry is expected to cost A\$150 million (US\$114.4 million). The majority of these costs lie in Proserpine and Mackay. 35% of all sugarcane in the Proserpine region and 20% of all sugarcane in the Mackay region have been damaged, costing A\$50 million and A\$81 million respectively." Gross value of Sugar cane - Cut for crushing (SA4 Mackay                                                                                    | (The Courier Mail, 2017) (QFF, 2017)                                                 |

|                                   |                          |                                               |                                                                                                                                                                                                                                                                                                                                                                                                                                                                                                                                                                                                                                                                                                                                                                                                                                                                                                                                                                                                                                                                                                                                                           |                               |
|-----------------------------------|--------------------------|-----------------------------------------------|-----------------------------------------------------------------------------------------------------------------------------------------------------------------------------------------------------------------------------------------------------------------------------------------------------------------------------------------------------------------------------------------------------------------------------------------------------------------------------------------------------------------------------------------------------------------------------------------------------------------------------------------------------------------------------------------------------------------------------------------------------------------------------------------------------------------------------------------------------------------------------------------------------------------------------------------------------------------------------------------------------------------------------------------------------------------------------------------------------------------------------------------------------------|-------------------------------|
|                                   |                          |                                               | region): 354M (2014/15) ABS 7503.0                                                                                                                                                                                                                                                                                                                                                                                                                                                                                                                                                                                                                                                                                                                                                                                                                                                                                                                                                                                                                                                                                                                        |                               |
| Agriculture                       | QLD-Mackay               | Other agriculture                             | "Canegrowers around Proserpine and Mackay, and the horticulture industry at Bowen — including tomato, capsicum and eggplant producers — have been the hardest hit."                                                                                                                                                                                                                                                                                                                                                                                                                                                                                                                                                                                                                                                                                                                                                                                                                                                                                                                                                                                       | (Donoughue, 2017)             |
| Vegetables                        | QLD-Mackay               | Other agriculture                             | "The Queensland Farmers Federation (QFF) said early figures show actual crop damage to Bowen's vegetable industry is about \$100 million, accounting for about 20 per cent of the season's crop."                                                                                                                                                                                                                                                                                                                                                                                                                                                                                                                                                                                                                                                                                                                                                                                                                                                                                                                                                         | (Donoughue, 2017)             |
| Vegetables                        | QLD-Mackay, QLD Northern | Other agriculture                             | "Winter crops lost in Bowen-Gumflu region \$A100 million"                                                                                                                                                                                                                                                                                                                                                                                                                                                                                                                                                                                                                                                                                                                                                                                                                                                                                                                                                                                                                                                                                                 | (Emerick, 2017)               |
| Vegetables                        | QLD-Mackay               | Other agriculture                             | "All vegetables in the ground in the Bowen and Whitsunday region have been lost. Over \$100 million worth of produce has been written off." Nurseries, cut flowers or cultivated turf, Fruit and nuts (excluding grapes), Vegetables for human consumption – Total (SA4 Mackay region): 188M (2014/15) ABS 7503.0                                                                                                                                                                                                                                                                                                                                                                                                                                                                                                                                                                                                                                                                                                                                                                                                                                         | (QFF, 2017)                   |
| Vegetables                        | NSW Richmond & Tweed     | Other agriculture                             | Australian Macadamia Society chief executive Jolyon Burnett said that lost nut would have been worth about \$8 million. Soybeans - "To date, \$3.75 million in crops have been reported lost in the Northern Rivers, and another \$445,000 of beans downgraded."                                                                                                                                                                                                                                                                                                                                                                                                                                                                                                                                                                                                                                                                                                                                                                                                                                                                                          | (Honan, 2017)                 |
| Agriculture, grains and sugarcane | All 19 regions           | Grains, Other agriculture, Sugar cane growing | STATE RECOVERY PLAN 2017-2019 Operation Queensland Recovery - "The National Farmers' Federation has cited industry groups estimating damage to crops of up to \$1 billion."                                                                                                                                                                                                                                                                                                                                                                                                                                                                                                                                                                                                                                                                                                                                                                                                                                                                                                                                                                               | (Queensland Government, 2017) |
| Dairy                             | QLD - Brisbane           | Dairy cattle and pigs                         | "it is anticipated that the cost to the farming industry in South East Queensland will be in excess of \$6 million." "So far major damages assessed have included: more than \$300,000 in losses to equipment including pumps, tractors, irrigation equipment; more than 200 hectares and 400 hectares of pasture lost; 121 km of fencing destroyed; more than 10 km of internal laneways damaged; more than 400 round bales hay lost; and the loss of 11 animals." <u>Queensland Dairyfarmers' Organisation (QDO)</u> report 50 dairy farms have been impacted South East QLD. Eight reported to have severe flooding through Logan and the Gold coast with some reporting 80% plus stock loss and severely damaged on farm infrastructure. Growcom have surveyed 12 farmers to date in SEQ. Several vegetable growers are reporting widespread flood damage, soil erosion, loss of irrigation equipment, some infrastructure damage and crop losses.<br><a href="http://www.dairypage.com.au/newsroom/2017/4/12/cyclone-debbies-6-million-impact-on-dairy">http://www.dairypage.com.au/newsroom/2017/4/12/cyclone-debbies-6-million-impact-on-dairy</a> | (Neville, 2017)               |
| Urban                             | QLD - Central            | Multiple sectors                              | Central Queensland: Rockhampton has started to be inundated with slow moving flood waters, the flood will peak of 9.0 meters today (06/04/2017). The slow-moving flood will effect a number of industries with Growcom and NGIQ watching the region closely. Cotton is likely to have some damage                                                                                                                                                                                                                                                                                                                                                                                                                                                                                                                                                                                                                                                                                                                                                                                                                                                         | (QFF, 2017)                   |

|                     |                   |                  |                                                                                                                                                                                                                                                                                                                                                                                                                                      |                                                          |
|---------------------|-------------------|------------------|--------------------------------------------------------------------------------------------------------------------------------------------------------------------------------------------------------------------------------------------------------------------------------------------------------------------------------------------------------------------------------------------------------------------------------------|----------------------------------------------------------|
|                     |                   |                  | through Central Queensland as well. With Cotton Australia ensuring that damage is reported through to the Government, although with the sparsity of the damage in these western regions they are investigating Individual Disaster Declarations for effected farms.                                                                                                                                                                  |                                                          |
| Infrastructure      | All QLD           | Multiple sectors | (1) "Queensland Premier Anastacia Palaszczuk said the cost of recovery would 'be in the billions' of dollars, with roads, bridges, crops, homes and schools all needing serious repairs."<br>(2) Cyclone Yasi was "the cost of rebuilding public infrastructure and supporting businesses and the community following these disasters totals approximately \$6.8 billion" (overlaps with other costs) and likely similar for Debbie. | (1) (Gillman, 2017)<br>(2) (Australian Government, 2011) |
| Disaster assistance | QLD most regions. | Multiple sectors | Minister Ryan said counter-disaster operations assistance will be made available to the eight local government areas of Burdekin, Charters Towers, Isaac, Hinchinbrook, Mackay, Palm Island, Townsville and Whitsunday.                                                                                                                                                                                                              | (Carruthers, 2017)                                       |
| Insurance           | National          | Multiple Sectors | "Insurance losses \$A306 million". Over a \$1bill in insurance claims but probably includes a lot of business loss claims (eg.in Logan and Lismore).<br><a href="https://www.cciq.com.au/news/cyclone-debbie-overall-damage-bill-and-economic-impact">https://www.cciq.com.au/news/cyclone-debbie-overall-damage-bill-and-economic-impact</a>                                                                                        | (Underwriter, 2017)                                      |
| Fatalities          | -                 | -                | 12 Fatalities. There are economic valuation estimates of value of life. Eg value of a statistical life \$4.2 million.                                                                                                                                                                                                                                                                                                                | (Department of the Prime Minister and Cabinet, 2014)     |
| Evacuation costs    | -                 | -                | 25,000 residents in Mackay, and 5,5000 Bowen evacuated.                                                                                                                                                                                                                                                                                                                                                                              | (BBC News, 2017) (Killalea et al., 2017)                 |
| Schools             | -                 | -                | 400 schools closed.                                                                                                                                                                                                                                                                                                                                                                                                                  | (Agence-France-Presse, 2017)                             |
| Airflights          | -                 | -                | Flights cancelled Townsville etc from March 27<br>Virgin Airlines loss in the 3 months to March \$62.3 million was impacted by Cyclone Debbie                                                                                                                                                                                                                                                                                        | (Courier Mail, 2017)                                     |
| Rail                | -                 | -                | QLD Rail suspended trains between Rocky and Townsville. North Queensland Bulk Ports closed at Mackay, Abbot Point and Hay Point.                                                                                                                                                                                                                                                                                                     | (North Queensland Bulk Ports Corporation, 2017)          |
| Emergency workers   | -                 | -                | 1000 emergency workers deployed, 200 Energex workers.                                                                                                                                                                                                                                                                                                                                                                                | (Cummins, 2017)                                          |
| Defence forces      | -                 | -                | ADF deployed 1200 personnel.                                                                                                                                                                                                                                                                                                                                                                                                         | (Young et al., 2017)                                     |

Table SI 2.3 Summary of major infrastructure damage and impacts by region

| Region              | Local council region | Major infrastructure (building, roads and transport) damage and impacts                                                                                                                                                                                                                                                         |
|---------------------|----------------------|---------------------------------------------------------------------------------------------------------------------------------------------------------------------------------------------------------------------------------------------------------------------------------------------------------------------------------|
| QLD – Mackay        | Whitsunday           | <ul style="list-style-type: none"> <li>• Whitsunday Coast Airport closed for six days.</li> <li>• Shute Harbour destroyed.</li> <li>• Substantial roads and bridges damaged.</li> <li>• Power disrupted for a number of days.</li> </ul>                                                                                        |
| QLD – Mackay        | Mackay               | <ul style="list-style-type: none"> <li>• Substantial roads damaged.</li> <li>• Iconic community assets destroyed or damaged.</li> <li>• Parks and places of cultural significance damaged.</li> </ul>                                                                                                                           |
| QLD – Mackay        | Isaac                | <ul style="list-style-type: none"> <li>• Substantial roads and bridges damaged.</li> <li>• Moranbah Airport closed for a number of days.</li> <li>• Power disrupted for a number of days.</li> <li>• Telecommunications and internet network disrupted for a significant number of days.</li> </ul>                             |
| QLD – Fitzroy       | Rockhampton          | <ul style="list-style-type: none"> <li>• Rockhampton Airport closed for ten days.</li> <li>• Rural roads damaged.</li> </ul>                                                                                                                                                                                                    |
| QLD – Fitzroy       | Livingstone Shire    | <ul style="list-style-type: none"> <li>• Roads damaged.</li> </ul>                                                                                                                                                                                                                                                              |
| QLD – Darling Downs | Scenic Rim           | <ul style="list-style-type: none"> <li>• Substantial roads and bridges damaged.</li> </ul>                                                                                                                                                                                                                                      |
| QLD – Brisbane      | City of Logan        | <ul style="list-style-type: none"> <li>• Public transport network disrupted for five days.</li> <li>• Road and bridges damaged.</li> <li>• 46 sport and recreation facilities were impacted from weeks to months.</li> <li>• Five wastewater pump stations damaged.</li> <li>• Power disrupted for a number of days.</li> </ul> |
| QLD – Brisbane      | City of Gold Coast   | <ul style="list-style-type: none"> <li>• Substantial roads and bridges damaged.</li> </ul>                                                                                                                                                                                                                                      |

### SI 3: Employment and value added effects for a range of thresholds

The magnitude of employment and value-added losses is expressed as  $\log_{10}|\Delta Q|$  and visualised as lines on a grey scale. Each line represents one of the 34 sectors in each region, in the sequence order listed in SI 1. The figures show that whilst only a few industries were directly affected by the initial damage from the cyclone (black stripes in Fig. 3), many more industries were affected indirectly.

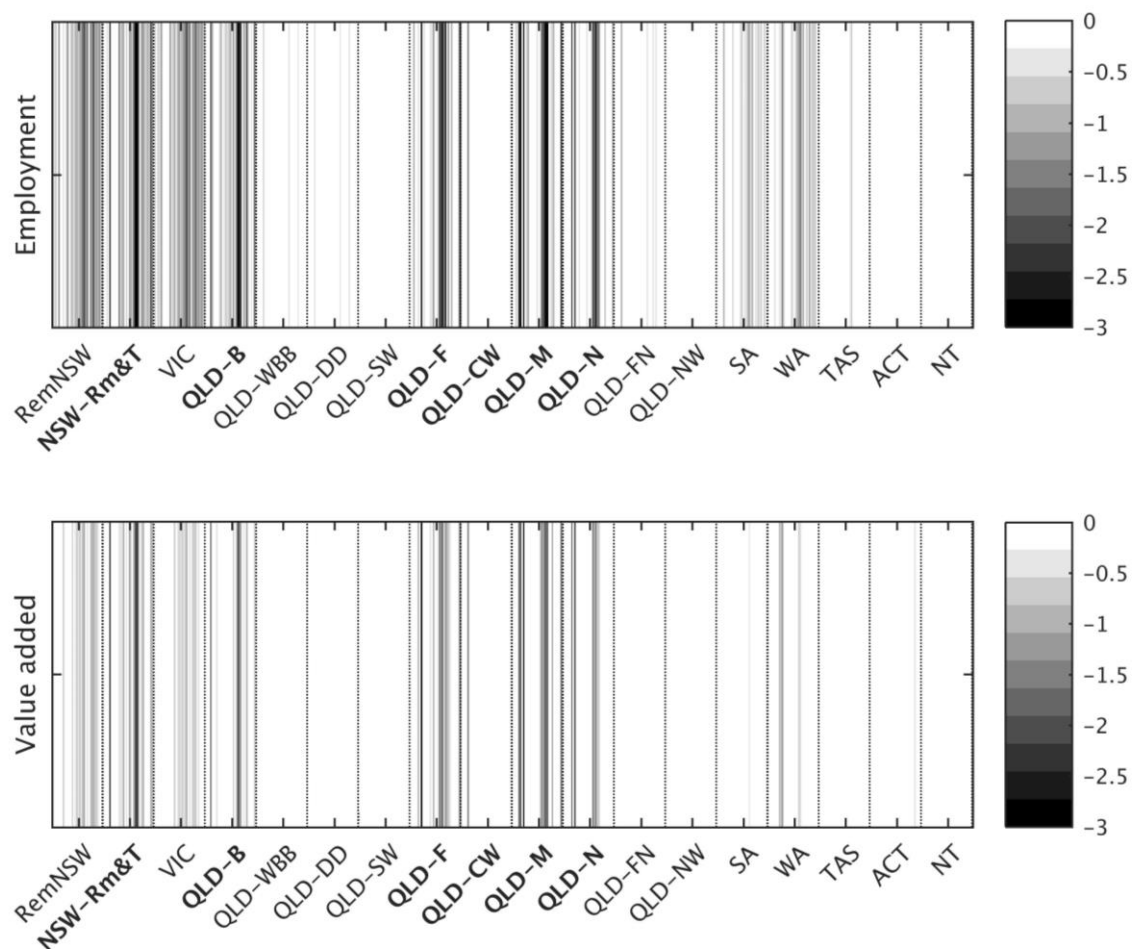

Figure SI 3.1 Employment and value added effects resulting from a tropical cyclone, modelled for threshold  $\theta$  1.000E-09 (see SI 2). The regions directly impacted by the cyclone are marked in bold. *Region acronyms:* RemNSW: Rest of New South Wales (NSW); NSW-Rm&T: NSW Richmond & Tweed; VIC: Victoria; QLD-B: Queensland (QLD) – Brisbane; QLD-WBB: Wide Bay Burnett; QLD-DD: Darling Downs, QL-SW: South West; QLD-F: Fitzroy; QLD-CW: Central West; QLD-M: Mackay; QLD-N: Northern; QLD-FN: Far North; QLD-NW: North West; SA: South Australia; WA: Western Australia; TAS: Tasmania; ACT: Australian Capital Territory; NT: Northern Territory.



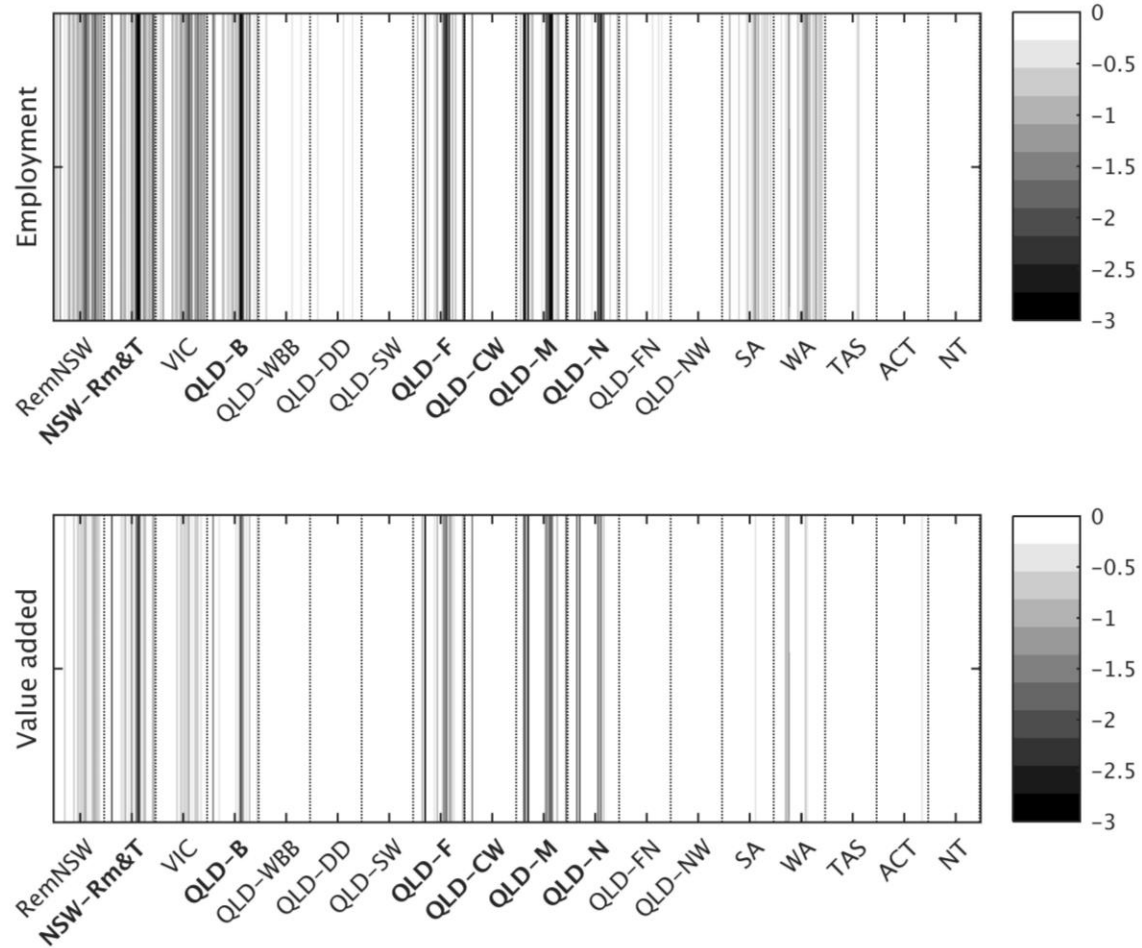

Figure SI 3.2 Employment and value added effects resulting from a tropical cyclone, modelled for threshold  $\theta$  3.981E-03 (see SI 2). The regions directly impacted by the cyclone are marked in bold. *Region acronyms:* RemNSW: Rest of New South Wales (NSW); NSW-Rm&T: NSW Richmond & Tweed; VIC: Victoria; QLD-B: Queensland (QLD) – Brisbane; QLD-WBB: Wide Bay Burnett; QLD-DD: Darling Downs, QL-SW: South West; QLD-F: Fitzroy; QLD-CW: Central West; QLD-M: Mackay; QLD-N: Northern; QLD-FN: Far North; QLD-NW: North West; SA: South Australia; WA: Western Australia; TAS: Tasmania; ACT: Australian Capital Territory; NT: Northern Territory.

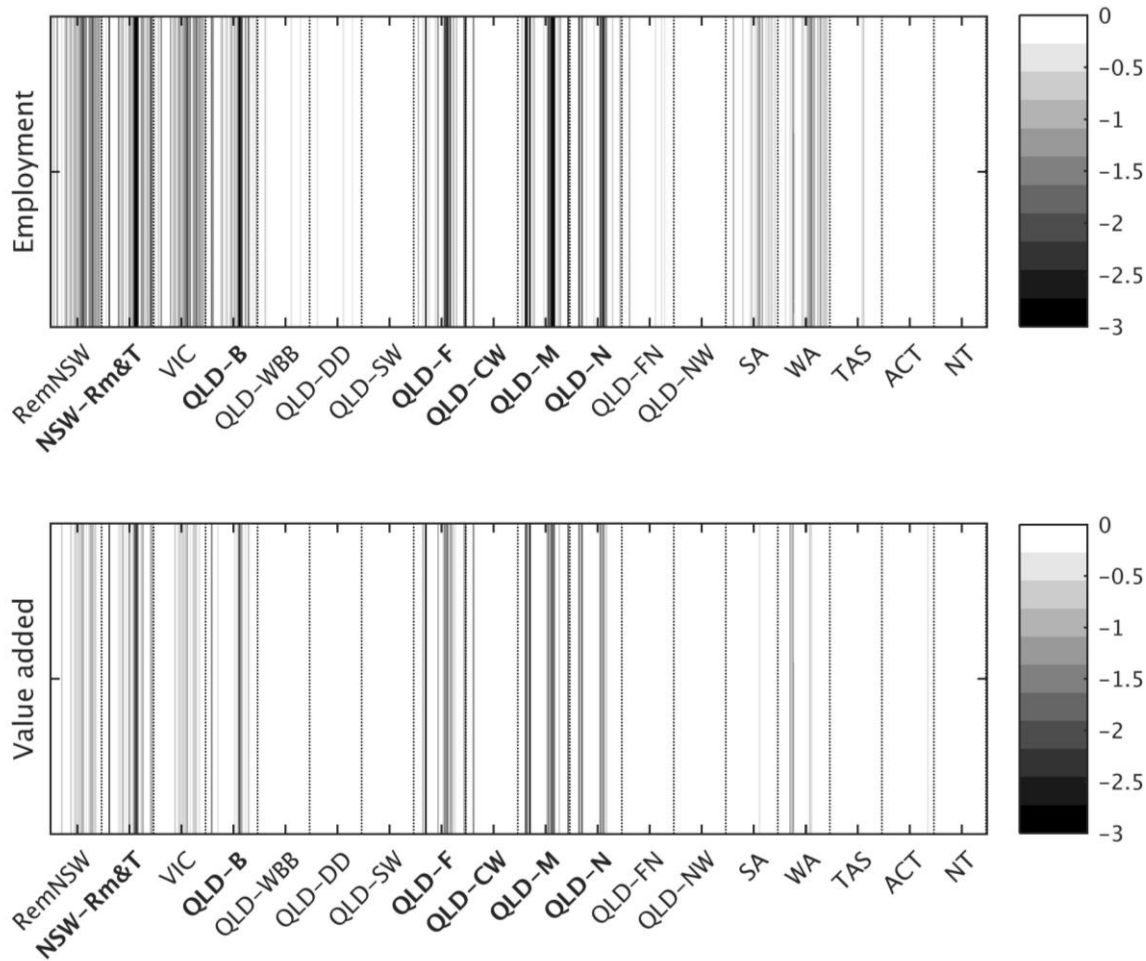

Figure SI 3.3 Employment and value added effects resulting from a tropical cyclone, modelled for threshold  $\theta$  7.079E-03 (see SI 2). The regions directly impacted by the cyclone are marked in bold. *Region acronyms:* RemNSW: Rest of New South Wales (NSW); NSW-Rm&T: NSW Richmond & Tweed; VIC: Victoria; QLD-B: Queensland (QLD) – Brisbane; QLD-WBB: Wide Bay Burnett; QLD-DD: Darling Downs, QL-SW: South West; QLD-F: Fitzroy; QLD-CW: Central West; QLD-M: Mackay; QLD-N: Northern; QLD-FN: Far North; QLD-NW: North West; SA: South Australia; WA: Western Australia; TAS: Tasmania; ACT: Australian Capital Territory; NT: Northern Territory.

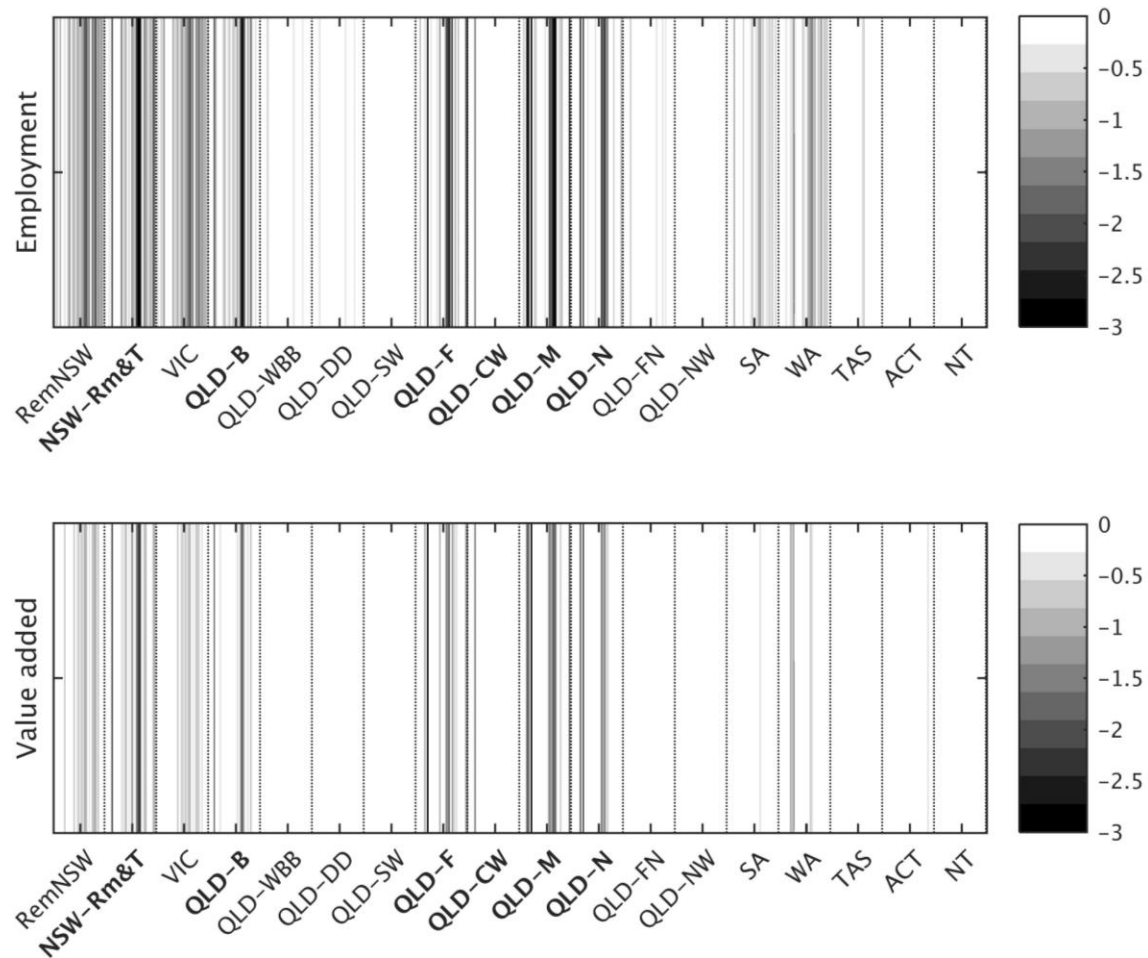

Figure SI 3.4 Employment and value added effects resulting from a tropical cyclone, modelled for threshold  $\theta$  1.047E-02 (see SI 2). The regions directly impacted by the cyclone are marked in bold. *Region acronyms:* RemNSW: Rest of New South Wales (NSW); NSW-Rm&T: NSW Richmond & Tweed; VIC: Victoria; QLD-B: Queensland (QLD) – Brisbane; QLD-WBB: Wide Bay Burnett; QLD-DD: Darling Downs, QL-SW: South West; QLD-F: Fitzroy; QLD-CW: Central West; QLD-M: Mackay; QLD-N: Northern; QLD-FN: Far North; QLD-NW: North West; SA: South Australia; WA: Western Australia; TAS: Tasmania; ACT: Australian Capital Territory; NT: Northern Territory.

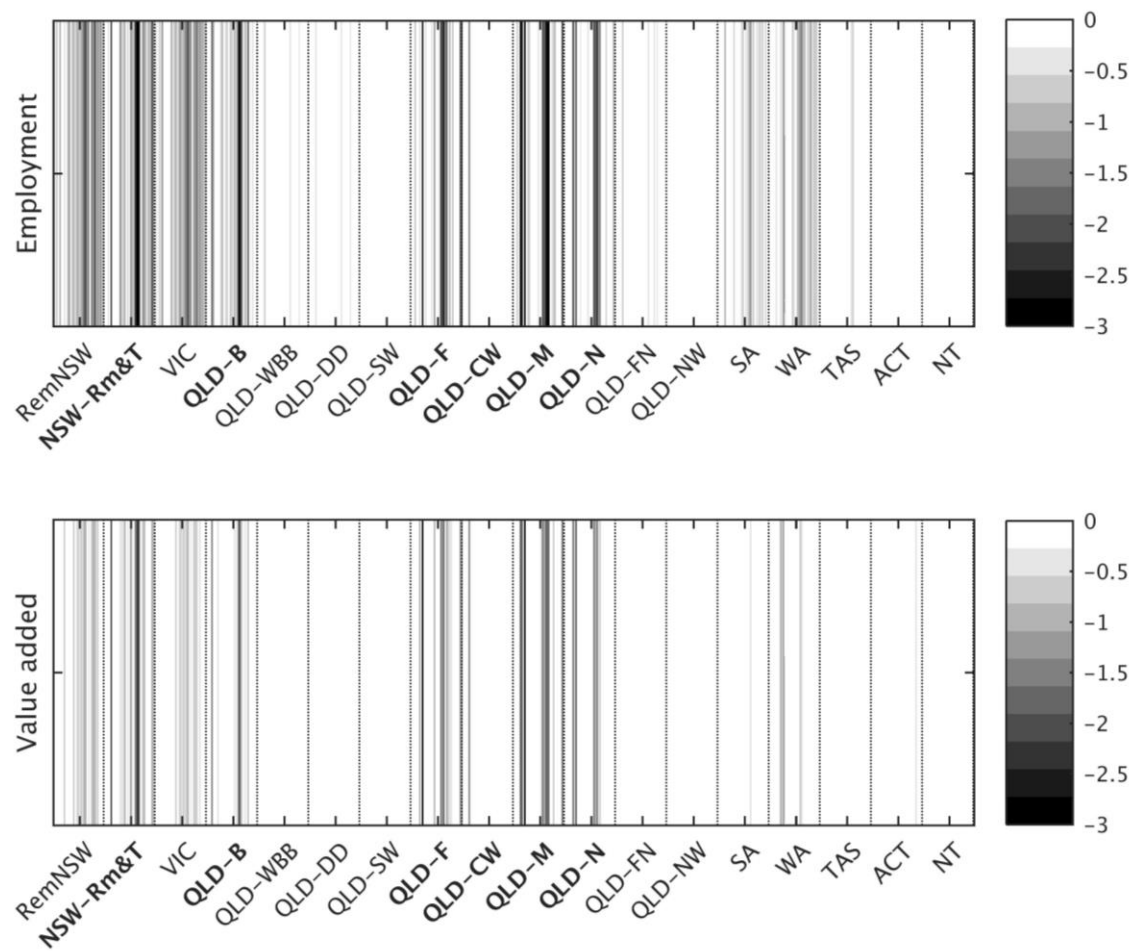

Figure SI 3.5 Employment and value added effects resulting from a tropical cyclone, modelled for threshold  $\theta$  1.259E-02 (see SI 2). The regions directly impacted by the cyclone are marked in bold. *Region acronyms:* RemNSW: Rest of New South Wales (NSW); NSW-Rm&T: NSW Richmond & Tweed; VIC: Victoria; QLD-B: Queensland (QLD) – Brisbane; QLD-WBB: Wide Bay Burnett; QLD-DD: Darling Downs, QLD-SW: South West; QLD-F: Fitzroy; QLD-CW: Central West; QLD-M: Mackay; QLD-N: Northern; QLD-FN: Far North; QLD-NW: North West; SA: South Australia; WA: Western Australia; TAS: Tasmania; ACT: Australian Capital Territory; NT: Northern Territory.

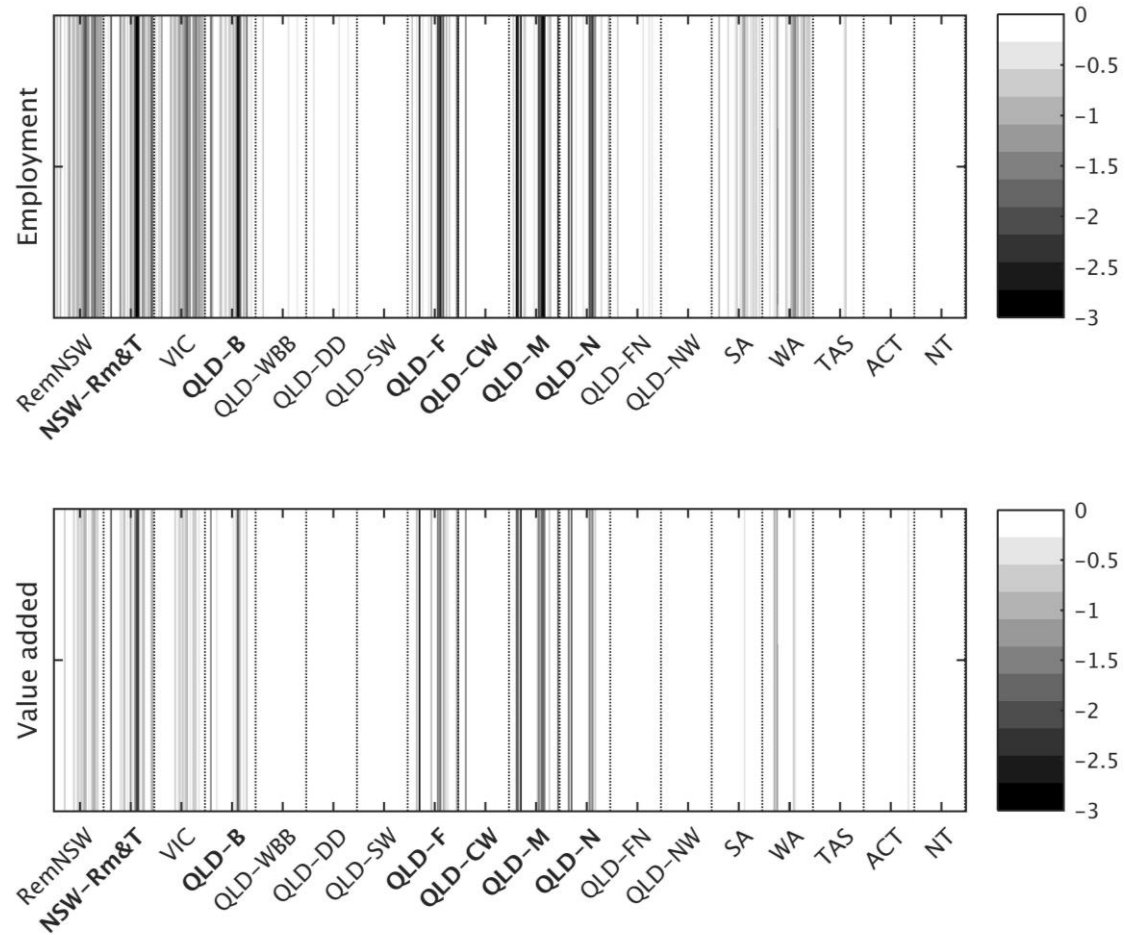

Figure SI 3.6 Employment and value added effects resulting from a tropical cyclone, modelled for threshold  $\theta$  1.413E-02 (see SI 2). The regions directly impacted by the cyclone are marked in bold. *Region acronyms:* RemNSW: Rest of New South Wales (NSW); NSW-Rm&T: NSW Richmond & Tweed; VIC: Victoria; QLD-B: Queensland (QLD) – Brisbane; QLD-WBB: Wide Bay Burnett; QLD-DD: Darling Downs, QLD-SW: South West; QLD-F: Fitzroy; QLD-CW: Central West; QLD-M: Mackay; QLD-N: Northern; QLD-FN: Far North; QLD-NW: North West; SA: South Australia; WA: Western Australia; TAS: Tasmania; ACT: Australian Capital Territory; NT: Northern Territory.

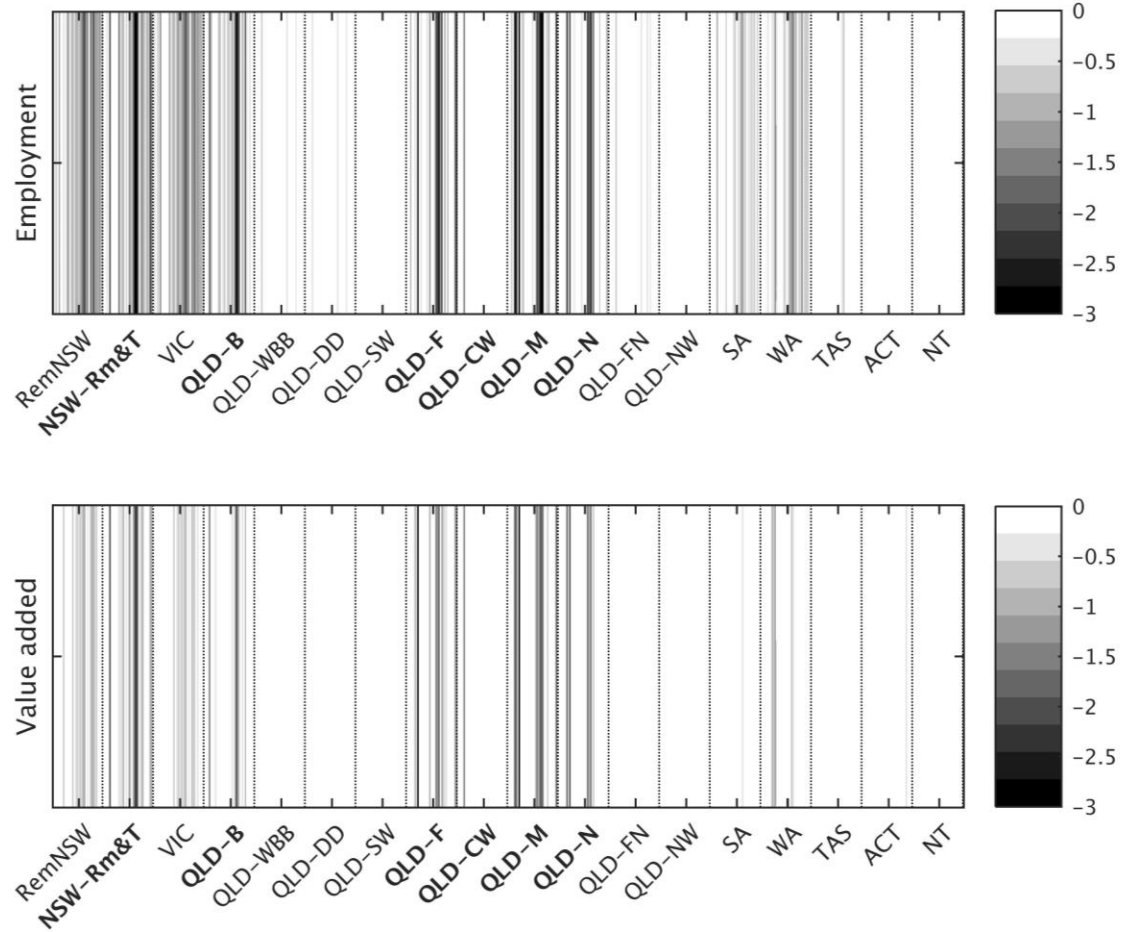

Figure SI 3.7 Employment and value added effects resulting from a tropical cyclone, modelled for threshold  $\theta$  1.445E-02 (see SI 2). The regions directly impacted by the cyclone are marked in bold. *Region acronyms:* RemNSW: Rest of New South Wales (NSW); NSW-Rm&T: NSW Richmond & Tweed; VIC: Victoria; QLD-B: Queensland (QLD) – Brisbane; QLD-WBB: Wide Bay Burnett; QLD-DD: Darling Downs, QL-SW: South West; QLD-F: Fitzroy; QLD-CW: Central West; QLD-M: Mackay; QLD-N: Northern; QLD-FN: Far North; QLD-NW: North West; SA: South Australia; WA: Western Australia; TAS: Tasmania; ACT: Australian Capital Territory; NT: Northern Territory.

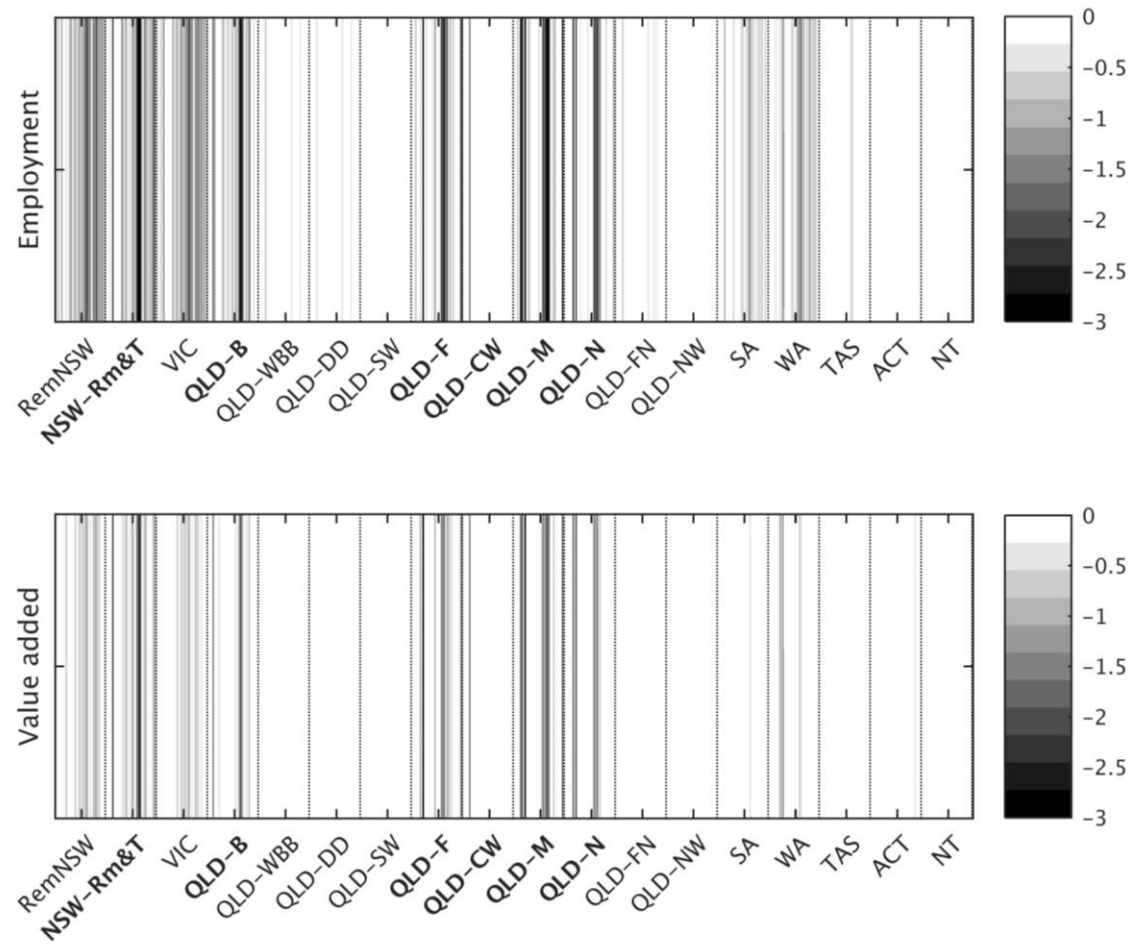

Figure SI 3.8 Employment and value added effects resulting from a tropical cyclone, modelled for threshold  $\theta$  1.585E-02 (see SI 2). The regions directly impacted by the cyclone are marked in bold. *Region acronyms:* RemNSW: Rest of New South Wales (NSW); NSW-Rm&T: NSW Richmond & Tweed; VIC: Victoria; QLD-B: Queensland (QLD) – Brisbane; QLD-WBB: Wide Bay Burnett; QLD-DD: Darling Downs, QL-SW: South West; QLD-F: Fitzroy; QLD-CW: Central West; QLD-M: Mackay; QLD-N: Northern; QLD-FN: Far North; QLD-NW: North West; SA: South Australia; WA: Western Australia; TAS: Tasmania; ACT: Australian Capital Territory; NT: Northern Territory.

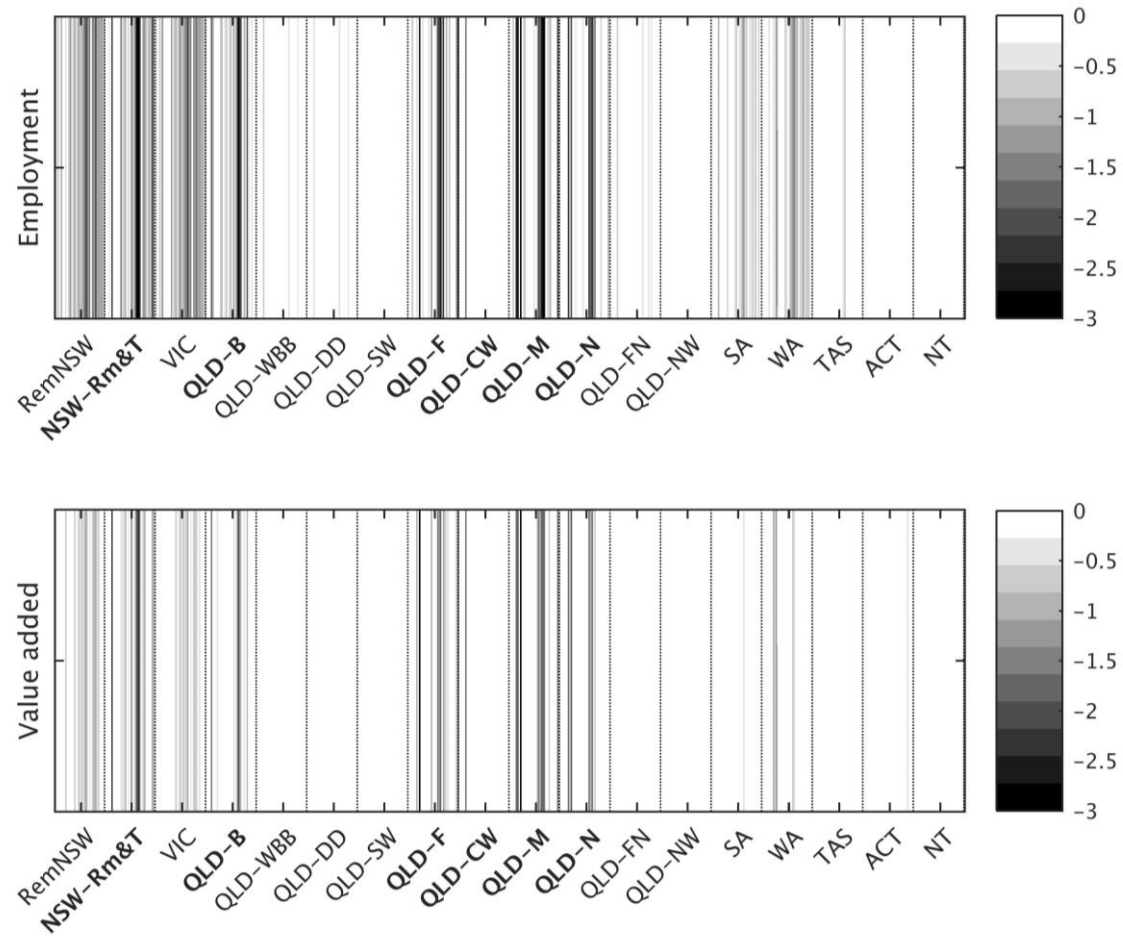

Figure SI 3.9 Employment and value added effects resulting from a tropical cyclone, modelled for threshold  $\theta$  1.995E-02 (see SI 2). The regions directly impacted by the cyclone are marked in bold. *Region acronyms:* RemNSW: Rest of New South Wales (NSW); NSW-Rm&T: NSW Richmond & Tweed; VIC: Victoria; QLD-B: Queensland (QLD) – Brisbane; QLD-WBB: Wide Bay Burnett; QLD-DD: Darling Downs, QLD-SW: South West; QLD-F: Fitzroy; QLD-CW: Central West; QLD-M: Mackay; QLD-N: Northern; QLD-FN: Far North; QLD-NW: North West; SA: South Australia; WA: Western Australia; TAS: Tasmania; ACT: Australian Capital Territory; NT: Northern Territory.



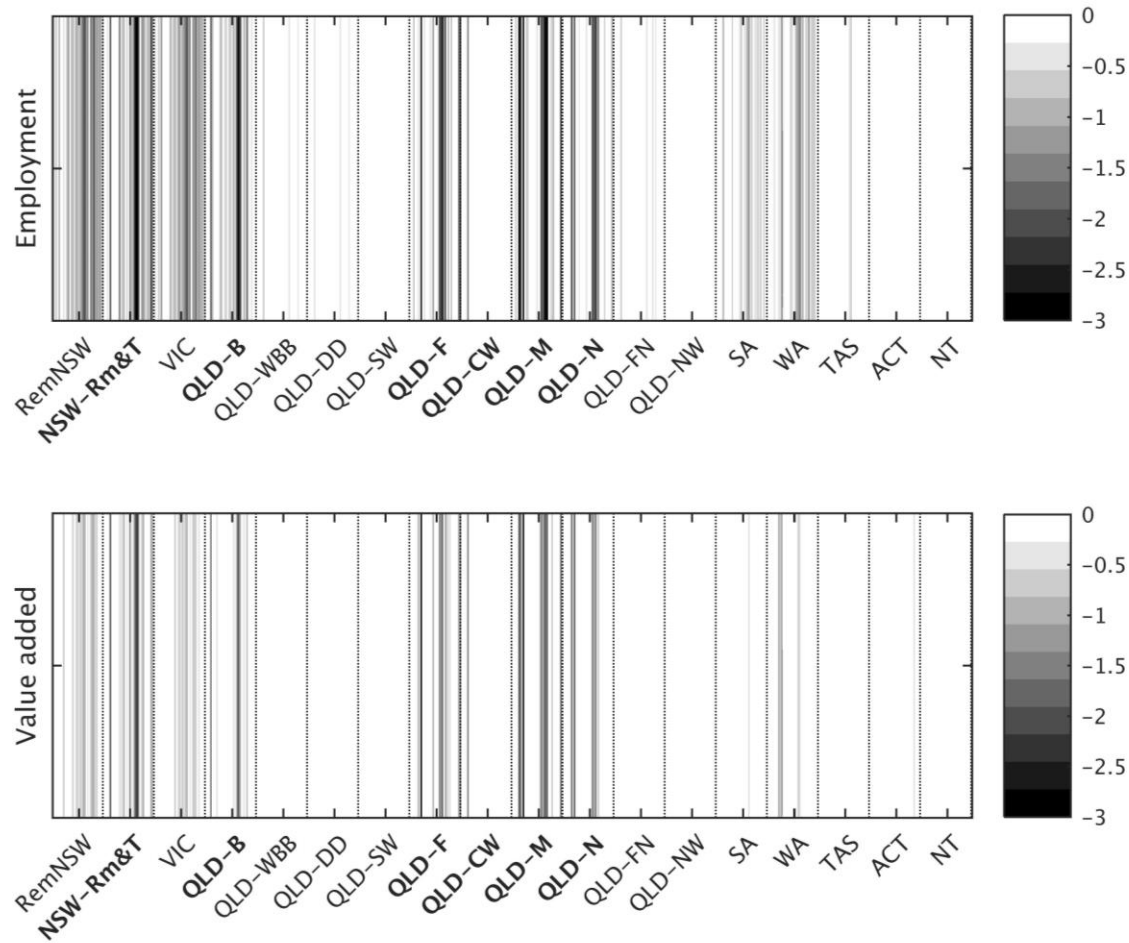

Figure SI 3.10 Employment and value added effects resulting from a tropical cyclone, modelled for threshold  $\theta$  2.884E-02 (see SI 2). The regions directly impacted by the cyclone are marked in bold. *Region acronyms:* RemNSW: Rest of New South Wales (NSW); NSW-Rm&T: NSW Richmond & Tweed; VIC: Victoria; QLD-B: Queensland (QLD) – Brisbane; QLD-WBB: Wide Bay Burnett; QLD-DD: Darling Downs, QLD-SW: South West; QLD-F: Fitzroy; QLD-CW: Central West; QLD-M: Mackay; QLD-N: Northern; QLD-FN: Far North; QLD-NW: North West; SA: South Australia; WA: Western Australia; TAS: Tasmania; ACT: Australian Capital Territory; NT: Northern Territory.

## SI 4: Raw data for production layer decomposition graphs

Table SI 4.1 Production layer decomposition for the indicator Employment (values are in Full-time Equivalent (FTE)). *Region acronyms:* RemNSW: Rest of New South Wales (NSW); NSW-Rm&T: NSW Richmond & Tweed; VIC: Victoria; QLD-B: Queensland (QLD) – Brisbane; QLD-WBB: Wide Bay Burnett; QLD-DD: Darling Downs, QL-SW: South West; QLD-F: Fitzroy; QLD-CW: Central West; QLD-M: Mackay; QLD-N: Northern; QLD-FN: Far North; QLD-NW: North West; SA: South Australia; WA: Western Australia; TAS: Tasmania; ACT: Australian Capital Territory; NT: Northern Territory.

| Production Layer | RemNSW  | NSW-Rm&T | VIC     | QLD-B    | QLD-WBB | QLD-DD | QLD-SW | QLD-F    | QLD-CW | QLD-M    | QLD-N   | QLD-FN | QLD-NW | SA     | WA      | TAS    | ACT   | NT    |
|------------------|---------|----------|---------|----------|---------|--------|--------|----------|--------|----------|---------|--------|--------|--------|---------|--------|-------|-------|
| 1                | 0.00    | -2728.35 | 0.00    | -863.25  | 0.00    | 0.00   | 0.00   | -1032.50 | -27.50 | -1980.60 | -459.36 | 0.00   | 0.00   | 0.00   | 0.00    | 0.00   | 0.00  | 0.00  |
| 2                | 0.00    | -3140.35 | 0.00    | -1524.25 | 0.00    | 0.00   | 0.00   | -1634.81 | -32.75 | -3197.89 | -779.26 | 0.00   | 0.00   | 0.00   | 0.00    | 0.00   | 0.00  | 0.00  |
| 3                | -202.93 | -3201.97 | -149.64 | -1631.24 | -7.76   | -4.91  | -0.20  | -1652.73 | -32.79 | -3217.31 | -794.31 | -8.29  | -0.04  | -35.27 | -44.90  | -5.80  | -3.28 | -2.65 |
| 4                | -351.78 | -3240.57 | -264.67 | -1720.44 | -14.65  | -9.64  | -0.40  | -1667.44 | -32.85 | -3230.06 | -806.33 | -16.32 | -0.13  | -64.52 | -105.82 | -12.29 | -6.70 | -6.24 |
| 5                | -420.79 | -3245.35 | -323.32 | -1736.95 | -15.96  | -10.54 | -0.43  | -1668.77 | -32.88 | -3231.04 | -807.45 | -17.55 | -0.16  | -75.97 | -131.11 | -14.16 | -7.79 | -7.50 |
| 6                | -463.04 | -3248.17 | -361.01 | -1745.39 | -16.65  | -11.09 | -0.45  | -1669.57 | -32.90 | -3231.48 | -807.96 | -18.10 | -0.18  | -82.86 | -144.45 | -14.80 | -8.26 | -7.96 |
| 7                | -481.26 | -3248.67 | -378.32 | -1748.26 | -16.90  | -11.27 | -0.46  | -1669.76 | -32.90 | -3231.61 | -808.11 | -18.29 | -0.19  | -85.57 | -150.98 | -15.09 | -8.46 | -8.18 |
| 8                | -491.94 | -3248.94 | -389.15 | -1749.70 | -17.01  | -11.35 | -0.46  | -1669.86 | -32.91 | -3231.67 | -808.18 | -18.37 | -0.19  | -87.13 | -153.99 | -15.22 | -8.56 | -8.27 |
| 9                | -496.56 | -3249.02 | -394.04 | -1750.32 | -17.07  | -11.39 | -0.46  | -1669.90 | -32.91 | -3231.70 | -808.21 | -18.41 | -0.19  | -87.77 | -155.49 | -15.28 | -8.60 | -8.32 |
| 10               | -499.21 | -3249.06 | -397.03 | -1750.64 | -17.09  | -11.40 | -0.47  | -1669.92 | -32.91 | -3231.71 | -808.23 | -18.43 | -0.19  | -88.13 | -156.19 | -15.31 | -8.62 | -8.34 |
| 11               | -500.38 | -3249.07 | -398.38 | -1750.79 | -17.10  | -11.41 | -0.47  | -1669.93 | -32.91 | -3231.72 | -808.23 | -18.44 | -0.19  | -88.29 | -156.55 | -15.32 | -8.63 | -8.35 |
| 12               | -501.04 | -3249.08 | -399.20 | -1750.87 | -17.11  | -11.42 | -0.47  | -1669.93 | -32.91 | -3231.72 | -808.24 | -18.44 | -0.19  | -88.37 | -156.72 | -15.33 | -8.64 | -8.36 |

Table SI 4.2 Production layer decomposition for the indicator Value-added (values are in AUD \$m). *Region acronyms:* RemNSW: Rest of New South Wales (NSW); NSW-Rm&T: NSW Richmond & Tweed; VIC: Victoria; QLD-B: Queensland (QLD) – Brisbane; QLD-WBB: Wide Bay Burnett; QLD-DD: Darling Downs, QL-SW: South West; QLD-F: Fitzroy; QLD-CW: Central West; QLD-M: Mackay; QLD-N: Northern; QLD-FN: Far North; QLD-NW: North West; SA: South Australia; WA: Western Australia; TAS: Tasmania; ACT: Australian Capital Territory; NT: Northern Territory.

| Production Layer | RemNSW | NSW-Rm&T | VIC    | QLD-B   | QLD-WBB | QLD-DD | QLD-SW | QLD-F   | QLD-CW | QLD-M    | QLD-N   | QLD-FN | QLD-NW | SA     | WA     | TAS   | ACT   | NT    |
|------------------|--------|----------|--------|---------|---------|--------|--------|---------|--------|----------|---------|--------|--------|--------|--------|-------|-------|-------|
| 1                | 0.00   | -332.51  | 0.00   | -87.97  | 0.00    | 0.00   | 0.00   | -484.79 | -24.56 | -773.66  | -145.70 | 0.00   | 0.00   | 0.00   | 0.00   | 0.00  | 0.00  | 0.00  |
| 2                | 0.00   | -445.16  | 0.00   | -155.73 | 0.00    | 0.00   | 0.00   | -815.34 | -29.25 | -1300.16 | -255.68 | 0.00   | 0.00   | 0.00   | 0.00   | 0.00  | 0.00  | 0.00  |
| 3                | -36.38 | -459.75  | -23.89 | -170.01 | -1.99   | -1.59  | -0.09  | -821.99 | -29.29 | -1306.68 | -258.70 | -1.28  | -0.05  | -7.36  | -18.46 | -1.07 | -1.89 | -0.75 |
| 4                | -64.35 | -468.59  | -42.98 | -182.67 | -3.73   | -3.26  | -0.17  | -827.72 | -29.30 | -1311.28 | -261.16 | -2.55  | -0.18  | -13.68 | -41.73 | -2.20 | -3.61 | -1.79 |
| 5                | -76.82 | -469.80  | -52.32 | -185.14 | -4.07   | -3.63  | -0.18  | -828.18 | -29.31 | -1311.58 | -261.40 | -2.75  | -0.21  | -16.05 | -49.60 | -2.50 | -4.07 | -2.14 |
| 6                | -84.50 | -470.46  | -58.37 | -186.29 | -4.26   | -3.84  | -0.19  | -828.49 | -29.31 | -1311.74 | -261.51 | -2.84  | -0.24  | -17.51 | -53.32 | -2.61 | -4.30 | -2.26 |
| 7                | -87.79 | -470.58  | -61.12 | -186.69 | -4.32   | -3.92  | -0.19  | -828.56 | -29.31 | -1311.79 | -261.54 | -2.87  | -0.25  | -18.07 | -55.13 | -2.66 | -4.39 | -2.32 |
| 8                | -89.73 | -470.64  | -62.86 | -186.89 | -4.35   | -3.95  | -0.19  | -828.60 | -29.31 | -1311.82 | -261.55 | -2.89  | -0.26  | -18.40 | -55.96 | -2.68 | -4.44 | -2.35 |
| 9                | -90.57 | -470.66  | -63.65 | -186.98 | -4.36   | -3.97  | -0.19  | -828.61 | -29.31 | -1311.83 | -261.56 | -2.89  | -0.26  | -18.54 | -56.37 | -2.69 | -4.46 | -2.36 |
| 10               | -91.05 | -470.67  | -64.13 | -187.02 | -4.37   | -3.97  | -0.20  | -828.62 | -29.31 | -1311.83 | -261.56 | -2.90  | -0.26  | -18.61 | -56.57 | -2.70 | -4.47 | -2.36 |
| 11               | -91.26 | -470.67  | -64.35 | -187.05 | -4.37   | -3.98  | -0.20  | -828.62 | -29.31 | -1311.83 | -261.56 | -2.90  | -0.26  | -18.65 | -56.66 | -2.70 | -4.48 | -2.37 |
| 12               | -91.38 | -470.67  | -64.48 | -187.06 | -4.37   | -3.98  | -0.20  | -828.62 | -29.31 | -1311.84 | -261.57 | -2.90  | -0.26  | -18.67 | -56.71 | -2.70 | -4.48 | -2.37 |

**SI 5: Underlying raw data for main text's Figure 3.**

| <b>Region</b> | <b>Sector number</b> | <b>Sector name</b>                      | <b>Employment Log10 (FTE)</b> | <b>Value added Log10(AUD\$m)</b> |
|---------------|----------------------|-----------------------------------------|-------------------------------|----------------------------------|
| Rest of NSW   | 1                    | Sheep                                   | -0.406                        | 0.000                            |
| Rest of NSW   | 2                    | Grains                                  | -0.459                        | 0.000                            |
| Rest of NSW   | 3                    | Beef cattle                             | -0.636                        | 0.000                            |
| Rest of NSW   | 4                    | Dairy cattle and pigs                   | 0.000                         | 0.000                            |
| Rest of NSW   | 5                    | Other agriculture                       | -1.091                        | 0.000                            |
| Rest of NSW   | 6                    | Sugar cane growing                      | 0.000                         | 0.000                            |
| Rest of NSW   | 7                    | Forestry and fishing                    | 0.000                         | 0.000                            |
| Rest of NSW   | 8                    | Coal, oil and gas                       | -0.483                        | -0.637                           |
| Rest of NSW   | 9                    | Non-ferrous metal ores                  | 0.000                         | 0.000                            |
| Rest of NSW   | 10                   | Other mining                            | -0.583                        | 0.000                            |
| Rest of NSW   | 11                   | Food manufacturing                      | -1.161                        | 0.000                            |
| Rest of NSW   | 12                   | Textiles, clothing and footwear         | -0.197                        | 0.000                            |
| Rest of NSW   | 13                   | Wood and paper manufacturing            | -0.652                        | -0.087                           |
| Rest of NSW   | 14                   | Chemicals, petroleum and coal products  | -0.838                        | -0.610                           |
| Rest of NSW   | 15                   | Non-metallic mineral products           | -0.475                        | 0.000                            |
| Rest of NSW   | 16                   | Metals, metal products                  | -1.026                        | -0.444                           |
| Rest of NSW   | 17                   | Machinery appliances and equipment      | -1.053                        | -0.619                           |
| Rest of NSW   | 18                   | Miscellaneous manufacturing             | -0.648                        | -0.380                           |
| Rest of NSW   | 19                   | Electricity supply, gas and water       | -1.031                        | -0.761                           |
| Rest of NSW   | 20                   | Residential building construction       | -1.257                        | -0.496                           |
| Rest of NSW   | 21                   | Other construction                      | -1.666                        | -0.854                           |
| Rest of NSW   | 22                   | Trade                                   | -2.044                        | -1.061                           |
| Rest of NSW   | 23                   | Accommodation, cafes and restaurants    | -1.225                        | -0.196                           |
| Rest of NSW   | 24                   | Road transport                          | -1.473                        | -0.467                           |
| Rest of NSW   | 25                   | Rail and pipeline transport             | 0.000                         | -0.177                           |
| Rest of NSW   | 26                   | Other transport                         | -1.368                        | -0.731                           |
| Rest of NSW   | 27                   | Communication services                  | -1.288                        | -0.901                           |
| Rest of NSW   | 28                   | Finance, property and business services | -1.958                        | -1.029                           |
| Rest of NSW   | 29                   | Ownership of dwellings                  | -1.073                        | -0.541                           |
| Rest of NSW   | 30                   | Government administration and defence   | -1.315                        | -0.623                           |
| Rest of NSW   | 31                   | Education                               | -1.072                        | -0.268                           |
| Rest of NSW   | 32                   | Health and community services           | -1.224                        | -0.173                           |
| Rest of NSW   | 33                   | Cultural and recreational services      | -0.608                        | 0.000                            |
| Rest of NSW   | 34                   | Personal and other services             | -0.708                        | 0.000                            |
| NSW-Rm&T      | 35                   | Sheep                                   | 0.000                         | 0.000                            |

|          |    |                                         |        |        |
|----------|----|-----------------------------------------|--------|--------|
| NSW-Rm&T | 36 | Grains                                  | 0.000  | -0.090 |
| NSW-Rm&T | 37 | Beef cattle                             | -0.381 | 0.000  |
| NSW-Rm&T | 38 | Dairy cattle and pigs                   | 0.000  | 0.000  |
| NSW-Rm&T | 39 | Other agriculture                       | -2.126 | -1.969 |
| NSW-Rm&T | 40 | Sugar cane growing                      | 0.000  | 0.000  |
| NSW-Rm&T | 41 | Forestry and fishing                    | 0.000  | 0.000  |
| NSW-Rm&T | 42 | Coal, oil and gas                       | 0.000  | 0.000  |
| NSW-Rm&T | 43 | Non-ferrous metal ores                  | 0.000  | 0.000  |
| NSW-Rm&T | 44 | Other mining                            | 0.000  | 0.000  |
| NSW-Rm&T | 45 | Food manufacturing                      | -1.470 | -0.530 |
| NSW-Rm&T | 46 | Textiles, clothing and footwear         | -0.333 | -0.399 |
| NSW-Rm&T | 47 | Wood and paper manufacturing            | -0.812 | -0.443 |
| NSW-Rm&T | 48 | Chemicals, petroleum and coal products  | -1.068 | -1.032 |
| NSW-Rm&T | 49 | Non-metallic mineral products           | -0.043 | -0.069 |
| NSW-Rm&T | 50 | Metals, metal products                  | -0.721 | -0.333 |
| NSW-Rm&T | 51 | Machinery appliances and equipment      | 0.000  | 0.000  |
| NSW-Rm&T | 52 | Miscellaneous manufacturing             | -1.190 | -1.230 |
| NSW-Rm&T | 53 | Electricity supply, gas and water       | -1.001 | -0.292 |
| NSW-Rm&T | 54 | Residential building construction       | -0.553 | 0.000  |
| NSW-Rm&T | 55 | Other construction                      | -2.124 | -1.250 |
| NSW-Rm&T | 56 | Trade                                   | -2.999 | -2.042 |
| NSW-Rm&T | 57 | Accommodation, cafes and restaurants    | -3.219 | -2.199 |
| NSW-Rm&T | 58 | Road transport                          | -1.700 | -0.843 |
| NSW-Rm&T | 59 | Rail and pipeline transport             | 0.000  | 0.000  |
| NSW-Rm&T | 60 | Other transport                         | -1.354 | -0.757 |
| NSW-Rm&T | 61 | Communication services                  | -1.311 | -1.035 |
| NSW-Rm&T | 62 | Finance, property and business services | -0.754 | -0.066 |
| NSW-Rm&T | 63 | Ownership of dwellings                  | -0.539 | -0.148 |
| NSW-Rm&T | 64 | Government administration and defence   | -0.837 | -0.174 |
| NSW-Rm&T | 65 | Education                               | -0.626 | 0.000  |
| NSW-Rm&T | 66 | Health and community services           | -2.030 | -0.953 |
| NSW-Rm&T | 67 | Cultural and recreational services      | -1.392 | -0.908 |
| NSW-Rm&T | 68 | Personal and other services             | -0.197 | 0.000  |
| VIC      | 69 | Sheep                                   | -0.348 | 0.000  |
| VIC      | 70 | Grains                                  | -0.227 | 0.000  |
| VIC      | 71 | Beef cattle                             | -0.556 | 0.000  |
| VIC      | 72 | Dairy cattle and pigs                   | -0.526 | 0.000  |
| VIC      | 73 | Other agriculture                       | -1.109 | -0.135 |
| VIC      | 74 | Sugar cane growing                      | 0.000  | 0.000  |
| VIC      | 75 | Forestry and fishing                    | 0.000  | 0.000  |
| VIC      | 76 | Coal, oil and gas                       | 0.000  | -0.127 |
| VIC      | 77 | Non-ferrous metal ores                  | 0.000  | 0.000  |
| VIC      | 78 | Other mining                            | -0.219 | -0.017 |

|       |     |                                         |        |        |
|-------|-----|-----------------------------------------|--------|--------|
| VIC   | 79  | Food manufacturing                      | -1.242 | 0.000  |
| VIC   | 80  | Textiles, clothing and footwear         | -0.340 | 0.000  |
| VIC   | 81  | Wood and paper manufacturing            | -0.619 | -0.028 |
| VIC   | 82  | Chemicals, petroleum and coal products  | -0.862 | -0.583 |
| VIC   | 83  | Non-metallic mineral products           | -0.363 | 0.000  |
| VIC   | 84  | Metals, metal products                  | -0.933 | -0.340 |
| VIC   | 85  | Machinery appliances and equipment      | -1.194 | -0.701 |
| VIC   | 86  | Miscellaneous manufacturing             | -0.729 | -0.296 |
| VIC   | 87  | Electricity supply, gas and water       | -1.024 | -0.546 |
| VIC   | 88  | Residential building construction       | -1.207 | -0.470 |
| VIC   | 89  | Other construction                      | -1.571 | -0.751 |
| VIC   | 90  | Trade                                   | -1.949 | -0.911 |
| VIC   | 91  | Accommodation, cafes and restaurants    | -1.114 | 0.000  |
| VIC   | 92  | Road transport                          | -1.384 | -0.369 |
| VIC   | 93  | Rail and pipeline transport             | 0.000  | 0.000  |
| VIC   | 94  | Other transport                         | -1.219 | -0.576 |
| VIC   | 95  | Communication services                  | -1.115 | -0.678 |
| VIC   | 96  | Finance, property and business services | -1.747 | -0.780 |
| VIC   | 97  | Ownership of dwellings                  | -0.855 | -0.227 |
| VIC   | 98  | Government administration and defence   | -1.099 | -0.337 |
| VIC   | 99  | Education                               | -1.013 | -0.138 |
| VIC   | 100 | Health and community services           | -1.085 | 0.000  |
| VIC   | 101 | Cultural and recreational services      | -0.646 | 0.000  |
| VIC   | 102 | Personal and other services             | -0.599 | 0.000  |
| QLD-B | 103 | Sheep                                   | 0.000  | 0.000  |
| QLD-B | 104 | Grains                                  | 0.000  | 0.000  |
| QLD-B | 105 | Beef cattle                             | 0.000  | 0.000  |
| QLD-B | 106 | Dairy cattle and pigs                   | -1.888 | -1.416 |
| QLD-B | 107 | Other agriculture                       | -0.818 | -0.069 |
| QLD-B | 108 | Sugar cane growing                      | 0.000  | 0.000  |
| QLD-B | 109 | Forestry and fishing                    | 0.000  | 0.000  |
| QLD-B | 110 | Coal, oil and gas                       | -0.074 | -0.360 |
| QLD-B | 111 | Non-ferrous metal ores                  | 0.000  | 0.000  |
| QLD-B | 112 | Other mining                            | -0.769 | 0.000  |
| QLD-B | 113 | Food manufacturing                      | -0.907 | 0.000  |
| QLD-B | 114 | Textiles, clothing and footwear         | -0.020 | 0.000  |
| QLD-B | 115 | Wood and paper manufacturing            | -0.318 | 0.000  |
| QLD-B | 116 | Chemicals, petroleum and coal products  | -0.683 | -0.213 |
| QLD-B | 117 | Non-metallic mineral products           | -0.240 | 0.000  |
| QLD-B | 118 | Metals, metal products                  | -0.703 | 0.000  |
| QLD-B | 119 | Machinery appliances and equipment      | -0.811 | -0.141 |
| QLD-B | 120 | Miscellaneous manufacturing             | -0.297 | 0.000  |
| QLD-B | 121 | Electricity supply, gas and water       | -0.849 | -0.447 |

|         |     |                                         |        |        |
|---------|-----|-----------------------------------------|--------|--------|
| QLD-B   | 122 | Residential building construction       | -0.468 | 0.000  |
| QLD-B   | 123 | Other construction                      | -1.490 | -0.635 |
| QLD-B   | 124 | Trade                                   | -3.092 | -2.054 |
| QLD-B   | 125 | Accommodation, cafes and restaurants    | -2.358 | -1.215 |
| QLD-B   | 126 | Road transport                          | -1.446 | -0.441 |
| QLD-B   | 127 | Rail and pipeline transport             | 0.000  | 0.000  |
| QLD-B   | 128 | Other transport                         | -1.085 | -0.356 |
| QLD-B   | 129 | Communication services                  | -0.311 | 0.000  |
| QLD-B   | 130 | Finance, property and business services | -1.936 | -0.868 |
| QLD-B   | 131 | Ownership of dwellings                  | -0.298 | 0.000  |
| QLD-B   | 132 | Government administration and defence   | -0.080 | 0.000  |
| QLD-B   | 133 | Education                               | -0.387 | 0.000  |
| QLD-B   | 134 | Health and community services           | 0.000  | 0.000  |
| QLD-B   | 135 | Cultural and recreational services      | -0.259 | 0.000  |
| QLD-B   | 136 | Personal and other services             | -0.168 | 0.000  |
| QLD-WBB | 137 | Sheep                                   | 0.000  | 0.000  |
| QLD-WBB | 138 | Grains                                  | 0.000  | 0.000  |
| QLD-WBB | 139 | Beef cattle                             | 0.000  | 0.000  |
| QLD-WBB | 140 | Dairy cattle and pigs                   | 0.000  | 0.000  |
| QLD-WBB | 141 | Other agriculture                       | -0.801 | -0.122 |
| QLD-WBB | 142 | Sugar cane growing                      | -0.049 | 0.000  |
| QLD-WBB | 143 | Forestry and fishing                    | 0.000  | 0.000  |
| QLD-WBB | 144 | Coal, oil and gas                       | 0.000  | 0.000  |
| QLD-WBB | 145 | Non-ferrous metal ores                  | 0.000  | 0.000  |
| QLD-WBB | 146 | Other mining                            | 0.000  | 0.000  |
| QLD-WBB | 147 | Food manufacturing                      | -0.041 | 0.000  |
| QLD-WBB | 148 | Textiles, clothing and footwear         | 0.000  | 0.000  |
| QLD-WBB | 149 | Wood and paper manufacturing            | 0.000  | 0.000  |
| QLD-WBB | 150 | Chemicals, petroleum and coal products  | 0.000  | 0.000  |
| QLD-WBB | 151 | Non-metallic mineral products           | 0.000  | 0.000  |
| QLD-WBB | 152 | Metals, metal products                  | 0.000  | 0.000  |
| QLD-WBB | 153 | Machinery appliances and equipment      | 0.000  | 0.000  |
| QLD-WBB | 154 | Miscellaneous manufacturing             | 0.000  | 0.000  |
| QLD-WBB | 155 | Electricity supply, gas and water       | 0.000  | 0.000  |
| QLD-WBB | 156 | Residential building construction       | 0.000  | 0.000  |
| QLD-WBB | 157 | Other construction                      | -0.221 | 0.000  |
| QLD-WBB | 158 | Trade                                   | -0.515 | 0.000  |
| QLD-WBB | 159 | Accommodation, cafes and restaurants    | 0.000  | 0.000  |
| QLD-WBB | 160 | Road transport                          | 0.000  | 0.000  |
| QLD-WBB | 161 | Rail and pipeline transport             | 0.000  | 0.000  |
| QLD-WBB | 162 | Other transport                         | 0.000  | 0.000  |
| QLD-WBB | 163 | Communication services                  | 0.000  | 0.000  |
| QLD-WBB | 164 | Finance, property and business services | -0.302 | 0.000  |

|         |     |                                         |        |        |
|---------|-----|-----------------------------------------|--------|--------|
| QLD-WBB | 165 | Ownership of dwellings                  | 0.000  | 0.000  |
| QLD-WBB | 166 | Government administration and defence   | 0.000  | 0.000  |
| QLD-WBB | 167 | Education                               | 0.000  | 0.000  |
| QLD-WBB | 168 | Health and community services           | 0.000  | 0.000  |
| QLD-WBB | 169 | Cultural and recreational services      | 0.000  | 0.000  |
| QLD-WBB | 170 | Personal and other services             | 0.000  | 0.000  |
| QLD-DD  | 171 | Sheep                                   | 0.000  | 0.000  |
| QLD-DD  | 172 | Grains                                  | 0.000  | 0.000  |
| QLD-DD  | 173 | Beef cattle                             | -0.075 | 0.000  |
| QLD-DD  | 174 | Dairy cattle and pigs                   | 0.000  | 0.000  |
| QLD-DD  | 175 | Other agriculture                       | -0.469 | -0.106 |
| QLD-DD  | 176 | Sugar cane growing                      | 0.000  | 0.000  |
| QLD-DD  | 177 | Forestry and fishing                    | 0.000  | 0.000  |
| QLD-DD  | 178 | Coal, oil and gas                       | 0.000  | 0.000  |
| QLD-DD  | 179 | Non-ferrous metal ores                  | 0.000  | 0.000  |
| QLD-DD  | 180 | Other mining                            | 0.000  | 0.000  |
| QLD-DD  | 181 | Food manufacturing                      | 0.000  | 0.000  |
| QLD-DD  | 182 | Textiles, clothing and footwear         | 0.000  | 0.000  |
| QLD-DD  | 183 | Wood and paper manufacturing            | 0.000  | 0.000  |
| QLD-DD  | 184 | Chemicals, petroleum and coal products  | 0.000  | 0.000  |
| QLD-DD  | 185 | Non-metallic mineral products           | 0.000  | 0.000  |
| QLD-DD  | 186 | Metals, metal products                  | 0.000  | 0.000  |
| QLD-DD  | 187 | Machinery appliances and equipment      | 0.000  | 0.000  |
| QLD-DD  | 188 | Miscellaneous manufacturing             | 0.000  | 0.000  |
| QLD-DD  | 189 | Electricity supply, gas and water       | 0.000  | 0.000  |
| QLD-DD  | 190 | Residential building construction       | 0.000  | 0.000  |
| QLD-DD  | 191 | Other construction                      | -0.182 | 0.000  |
| QLD-DD  | 192 | Trade                                   | -0.434 | 0.000  |
| QLD-DD  | 193 | Accommodation, cafes and restaurants    | 0.000  | 0.000  |
| QLD-DD  | 194 | Road transport                          | -0.022 | 0.000  |
| QLD-DD  | 195 | Rail and pipeline transport             | 0.000  | 0.000  |
| QLD-DD  | 196 | Other transport                         | 0.000  | 0.000  |
| QLD-DD  | 197 | Communication services                  | 0.000  | 0.000  |
| QLD-DD  | 198 | Finance, property and business services | -0.303 | 0.000  |
| QLD-DD  | 199 | Ownership of dwellings                  | 0.000  | 0.000  |
| QLD-DD  | 200 | Government administration and defence   | 0.000  | 0.000  |
| QLD-DD  | 201 | Education                               | 0.000  | 0.000  |
| QLD-DD  | 202 | Health and community services           | 0.000  | 0.000  |
| QLD-DD  | 203 | Cultural and recreational services      | 0.000  | 0.000  |
| QLD-DD  | 204 | Personal and other services             | 0.000  | 0.000  |
| QLD-SW  | 205 | Sheep                                   | 0.000  | 0.000  |
| QLD-SW  | 206 | Grains                                  | 0.000  | 0.000  |
| QLD-SW  | 207 | Beef cattle                             | 0.000  | 0.000  |

|        |     |                                         |        |        |
|--------|-----|-----------------------------------------|--------|--------|
| QLD-SW | 208 | Dairy cattle and pigs                   | 0.000  | 0.000  |
| QLD-SW | 209 | Other agriculture                       | 0.000  | 0.000  |
| QLD-SW | 210 | Sugar cane growing                      | 0.000  | 0.000  |
| QLD-SW | 211 | Forestry and fishing                    | 0.000  | 0.000  |
| QLD-SW | 212 | Coal, oil and gas                       | 0.000  | 0.000  |
| QLD-SW | 213 | Non-ferrous metal ores                  | 0.000  | 0.000  |
| QLD-SW | 214 | Other mining                            | 0.000  | 0.000  |
| QLD-SW | 215 | Food manufacturing                      | 0.000  | 0.000  |
| QLD-SW | 216 | Textiles, clothing and footwear         | 0.000  | 0.000  |
| QLD-SW | 217 | Wood and paper manufacturing            | 0.000  | 0.000  |
| QLD-SW | 218 | Chemicals, petroleum and coal products  | 0.000  | 0.000  |
| QLD-SW | 219 | Non-metallic mineral products           | 0.000  | 0.000  |
| QLD-SW | 220 | Metals, metal products                  | 0.000  | 0.000  |
| QLD-SW | 221 | Machinery appliances and equipment      | 0.000  | 0.000  |
| QLD-SW | 222 | Miscellaneous manufacturing             | 0.000  | 0.000  |
| QLD-SW | 223 | Electricity supply, gas and water       | 0.000  | 0.000  |
| QLD-SW | 224 | Residential building construction       | 0.000  | 0.000  |
| QLD-SW | 225 | Other construction                      | 0.000  | 0.000  |
| QLD-SW | 226 | Trade                                   | 0.000  | 0.000  |
| QLD-SW | 227 | Accommodation, cafes and restaurants    | 0.000  | 0.000  |
| QLD-SW | 228 | Road transport                          | 0.000  | 0.000  |
| QLD-SW | 229 | Rail and pipeline transport             | 0.000  | 0.000  |
| QLD-SW | 230 | Other transport                         | 0.000  | 0.000  |
| QLD-SW | 231 | Communication services                  | 0.000  | 0.000  |
| QLD-SW | 232 | Finance, property and business services | 0.000  | 0.000  |
| QLD-SW | 233 | Ownership of dwellings                  | 0.000  | 0.000  |
| QLD-SW | 234 | Government administration and defence   | 0.000  | 0.000  |
| QLD-SW | 235 | Education                               | 0.000  | 0.000  |
| QLD-SW | 236 | Health and community services           | 0.000  | 0.000  |
| QLD-SW | 237 | Cultural and recreational services      | 0.000  | 0.000  |
| QLD-SW | 238 | Personal and other services             | 0.000  | 0.000  |
| QLD-F  | 239 | Sheep                                   | 0.000  | 0.000  |
| QLD-F  | 240 | Grains                                  | 0.000  | 0.000  |
| QLD-F  | 241 | Beef cattle                             | -0.906 | 0.000  |
| QLD-F  | 242 | Dairy cattle and pigs                   | 0.000  | 0.000  |
| QLD-F  | 243 | Other agriculture                       | 0.000  | 0.000  |
| QLD-F  | 244 | Sugar cane growing                      | -0.452 | -0.940 |
| QLD-F  | 245 | Forestry and fishing                    | 0.000  | 0.000  |
| QLD-F  | 246 | Coal, oil and gas                       | -2.648 | -2.796 |
| QLD-F  | 247 | Non-ferrous metal ores                  | 0.000  | 0.000  |
| QLD-F  | 248 | Other mining                            | -0.455 | 0.000  |
| QLD-F  | 249 | Food manufacturing                      | -0.045 | 0.000  |
| QLD-F  | 250 | Textiles, clothing and footwear         | 0.000  | 0.000  |



|        |     |                                         |        |        |
|--------|-----|-----------------------------------------|--------|--------|
| QLD-F  | 251 | Wood and paper manufacturing            | 0.000  | 0.000  |
| QLD-F  | 252 | Chemicals, petroleum and coal products  | -0.346 | -0.262 |
| QLD-F  | 253 | Non-metallic mineral products           | -0.271 | 0.000  |
| QLD-F  | 254 | Metals, metal products                  | -1.131 | -0.881 |
| QLD-F  | 255 | Machinery appliances and equipment      | 0.000  | 0.000  |
| QLD-F  | 256 | Miscellaneous manufacturing             | 0.000  | 0.000  |
| QLD-F  | 257 | Electricity supply, gas and water       | -0.353 | -0.223 |
| QLD-F  | 258 | Residential building construction       | -2.064 | -1.428 |
| QLD-F  | 259 | Other construction                      | -1.965 | -1.178 |
| QLD-F  | 260 | Trade                                   | -2.699 | -1.705 |
| QLD-F  | 261 | Accommodation, cafes and restaurants    | -1.222 | -0.201 |
| QLD-F  | 262 | Road transport                          | -2.254 | -1.339 |
| QLD-F  | 263 | Rail and pipeline transport             | 0.000  | -0.811 |
| QLD-F  | 264 | Other transport                         | -0.986 | -0.443 |
| QLD-F  | 265 | Communication services                  | -0.085 | -0.410 |
| QLD-F  | 266 | Finance, property and business services | -0.890 | 0.000  |
| QLD-F  | 267 | Ownership of dwellings                  | 0.000  | 0.000  |
| QLD-F  | 268 | Government administration and defence   | 0.000  | 0.000  |
| QLD-F  | 269 | Education                               | 0.000  | 0.000  |
| QLD-F  | 270 | Health and community services           | 0.000  | 0.000  |
| QLD-F  | 271 | Cultural and recreational services      | -1.621 | -1.040 |
| QLD-F  | 272 | Personal and other services             | -2.358 | -1.615 |
| QLD-CW | 273 | Sheep                                   | 0.000  | 0.000  |
| QLD-CW | 274 | Grains                                  | 0.000  | 0.000  |
| QLD-CW | 275 | Beef cattle                             | 0.000  | 0.000  |
| QLD-CW | 276 | Dairy cattle and pigs                   | 0.000  | 0.000  |
| QLD-CW | 277 | Other agriculture                       | -1.516 | -1.467 |
| QLD-CW | 278 | Sugar cane growing                      | 0.000  | 0.000  |
| QLD-CW | 279 | Forestry and fishing                    | 0.000  | 0.000  |
| QLD-CW | 280 | Coal, oil and gas                       | 0.000  | 0.000  |
| QLD-CW | 281 | Non-ferrous metal ores                  | 0.000  | 0.000  |
| QLD-CW | 282 | Other mining                            | 0.000  | 0.000  |
| QLD-CW | 283 | Food manufacturing                      | 0.000  | 0.000  |
| QLD-CW | 284 | Textiles, clothing and footwear         | 0.000  | 0.000  |
| QLD-CW | 285 | Wood and paper manufacturing            | 0.000  | 0.000  |
| QLD-CW | 286 | Chemicals, petroleum and coal products  | 0.000  | 0.000  |
| QLD-CW | 287 | Non-metallic mineral products           | 0.000  | 0.000  |
| QLD-CW | 288 | Metals, metal products                  | 0.000  | 0.000  |
| QLD-CW | 289 | Machinery appliances and equipment      | 0.000  | 0.000  |
| QLD-CW | 290 | Miscellaneous manufacturing             | 0.000  | 0.000  |
| QLD-CW | 291 | Electricity supply, gas and water       | 0.000  | 0.000  |
| QLD-CW | 292 | Residential building construction       | 0.000  | 0.000  |
| QLD-CW | 293 | Other construction                      | 0.000  | 0.000  |

|        |     |                                         |        |        |
|--------|-----|-----------------------------------------|--------|--------|
| QLD-CW | 294 | Trade                                   | 0.000  | 0.000  |
| QLD-CW | 295 | Accommodation, cafes and restaurants    | 0.000  | 0.000  |
| QLD-CW | 296 | Road transport                          | 0.000  | 0.000  |
| QLD-CW | 297 | Rail and pipeline transport             | 0.000  | 0.000  |
| QLD-CW | 298 | Other transport                         | 0.000  | 0.000  |
| QLD-CW | 299 | Communication services                  | 0.000  | 0.000  |
| QLD-CW | 300 | Finance, property and business services | 0.000  | 0.000  |
| QLD-CW | 301 | Ownership of dwellings                  | 0.000  | 0.000  |
| QLD-CW | 302 | Government administration and defence   | 0.000  | 0.000  |
| QLD-CW | 303 | Education                               | 0.000  | 0.000  |
| QLD-CW | 304 | Health and community services           | 0.000  | 0.000  |
| QLD-CW | 305 | Cultural and recreational services      | 0.000  | 0.000  |
| QLD-CW | 306 | Personal and other services             | 0.000  | 0.000  |
| QLD-M  | 307 | Sheep                                   | 0.000  | 0.000  |
| QLD-M  | 308 | Grains                                  | 0.000  | 0.000  |
| QLD-M  | 309 | Beef cattle                             | -0.788 | 0.000  |
| QLD-M  | 310 | Dairy cattle and pigs                   | 0.000  | 0.000  |
| QLD-M  | 311 | Other agriculture                       | -2.493 | -1.844 |
| QLD-M  | 312 | Sugar cane growing                      | -2.603 | -1.897 |
| QLD-M  | 313 | Forestry and fishing                    | 0.000  | 0.000  |
| QLD-M  | 314 | Coal, oil and gas                       | -2.875 | -2.959 |
| QLD-M  | 315 | Non-ferrous metal ores                  | 0.000  | 0.000  |
| QLD-M  | 316 | Other mining                            | -0.590 | -0.001 |
| QLD-M  | 317 | Food manufacturing                      | -0.809 | 0.000  |
| QLD-M  | 318 | Textiles, clothing and footwear         | 0.000  | 0.000  |
| QLD-M  | 319 | Wood and paper manufacturing            | 0.000  | 0.000  |
| QLD-M  | 320 | Chemicals, petroleum and coal products  | 0.000  | 0.000  |
| QLD-M  | 321 | Non-metallic mineral products           | 0.000  | 0.000  |
| QLD-M  | 322 | Metals, metal products                  | -0.083 | 0.000  |
| QLD-M  | 323 | Machinery appliances and equipment      | -0.293 | 0.000  |
| QLD-M  | 324 | Miscellaneous manufacturing             | 0.000  | 0.000  |
| QLD-M  | 325 | Electricity supply, gas and water       | -0.464 | -0.713 |
| QLD-M  | 326 | Residential building construction       | -2.004 | -1.416 |
| QLD-M  | 327 | Other construction                      | -1.845 | -0.997 |
| QLD-M  | 328 | Trade                                   | -2.637 | -1.667 |
| QLD-M  | 329 | Accommodation, cafes and restaurants    | -2.767 | -1.805 |
| QLD-M  | 330 | Road transport                          | -2.526 | -1.532 |
| QLD-M  | 331 | Rail and pipeline transport             | 0.000  | 0.000  |
| QLD-M  | 332 | Other transport                         | -0.489 | 0.000  |
| QLD-M  | 333 | Communication services                  | -0.741 | -0.798 |
| QLD-M  | 334 | Finance, property and business services | -0.820 | 0.000  |
| QLD-M  | 335 | Ownership of dwellings                  | 0.000  | 0.000  |
| QLD-M  | 336 | Government administration and defence   | 0.000  | 0.000  |

|        |     |                                         |        |        |
|--------|-----|-----------------------------------------|--------|--------|
| QLD-M  | 337 | Education                               | 0.000  | 0.000  |
| QLD-M  | 338 | Health and community services           | 0.000  | 0.000  |
| QLD-M  | 339 | Cultural and recreational services      | -2.323 | -1.754 |
| QLD-M  | 340 | Personal and other services             | 0.000  | 0.000  |
| QLD-N  | 341 | Sheep                                   | 0.000  | 0.000  |
| QLD-N  | 342 | Grains                                  | 0.000  | 0.000  |
| QLD-N  | 343 | Beef cattle                             | 0.000  | 0.000  |
| QLD-N  | 344 | Dairy cattle and pigs                   | 0.000  | 0.000  |
| QLD-N  | 345 | Other agriculture                       | 0.000  | 0.000  |
| QLD-N  | 346 | Sugar cane growing                      | -2.318 | -1.690 |
| QLD-N  | 347 | Forestry and fishing                    | 0.000  | 0.000  |
| QLD-N  | 348 | Coal, oil and gas                       | -1.920 | -2.112 |
| QLD-N  | 349 | Non-ferrous metal ores                  | 0.000  | 0.000  |
| QLD-N  | 350 | Other mining                            | -0.164 | 0.000  |
| QLD-N  | 351 | Food manufacturing                      | -0.355 | 0.000  |
| QLD-N  | 352 | Textiles, clothing and footwear         | 0.000  | 0.000  |
| QLD-N  | 353 | Wood and paper manufacturing            | 0.000  | 0.000  |
| QLD-N  | 354 | Chemicals, petroleum and coal products  | 0.000  | 0.000  |
| QLD-N  | 355 | Non-metallic mineral products           | 0.000  | 0.000  |
| QLD-N  | 356 | Metals, metal products                  | -0.447 | 0.000  |
| QLD-N  | 357 | Machinery appliances and equipment      | 0.000  | 0.000  |
| QLD-N  | 358 | Miscellaneous manufacturing             | 0.000  | 0.000  |
| QLD-N  | 359 | Electricity supply, gas and water       | -0.037 | 0.000  |
| QLD-N  | 360 | Residential building construction       | -2.044 | -1.421 |
| QLD-N  | 361 | Other construction                      | -1.707 | -0.870 |
| QLD-N  | 362 | Trade                                   | -2.453 | -1.581 |
| QLD-N  | 363 | Accommodation, cafes and restaurants    | -1.253 | -0.302 |
| QLD-N  | 364 | Road transport                          | -1.475 | -0.584 |
| QLD-N  | 365 | Rail and pipeline transport             | 0.000  | 0.000  |
| QLD-N  | 366 | Other transport                         | -0.245 | 0.000  |
| QLD-N  | 367 | Communication services                  | 0.000  | 0.000  |
| QLD-N  | 368 | Finance, property and business services | -0.789 | 0.000  |
| QLD-N  | 369 | Ownership of dwellings                  | 0.000  | 0.000  |
| QLD-N  | 370 | Government administration and defence   | 0.000  | 0.000  |
| QLD-N  | 371 | Education                               | 0.000  | 0.000  |
| QLD-N  | 372 | Health and community services           | 0.000  | 0.000  |
| QLD-N  | 373 | Cultural and recreational services      | -0.868 | -0.053 |
| QLD-N  | 374 | Personal and other services             | 0.000  | 0.000  |
| QLD-FN | 375 | Sheep                                   | 0.000  | 0.000  |
| QLD-FN | 376 | Grains                                  | 0.000  | 0.000  |
| QLD-FN | 377 | Beef cattle                             | 0.000  | 0.000  |
| QLD-FN | 378 | Dairy cattle and pigs                   | 0.000  | 0.000  |
| QLD-FN | 379 | Other agriculture                       | -0.818 | 0.000  |

|        |     |                                         |        |       |
|--------|-----|-----------------------------------------|--------|-------|
| QLD-FN | 380 | Sugar cane growing                      | -0.074 | 0.000 |
| QLD-FN | 381 | Forestry and fishing                    | 0.000  | 0.000 |
| QLD-FN | 382 | Coal, oil and gas                       | 0.000  | 0.000 |
| QLD-FN | 383 | Non-ferrous metal ores                  | 0.000  | 0.000 |
| QLD-FN | 384 | Other mining                            | 0.000  | 0.000 |
| QLD-FN | 385 | Food manufacturing                      | 0.000  | 0.000 |
| QLD-FN | 386 | Textiles, clothing and footwear         | 0.000  | 0.000 |
| QLD-FN | 387 | Wood and paper manufacturing            | 0.000  | 0.000 |
| QLD-FN | 388 | Chemicals, petroleum and coal products  | 0.000  | 0.000 |
| QLD-FN | 389 | Non-metallic mineral products           | 0.000  | 0.000 |
| QLD-FN | 390 | Metals, metal products                  | 0.000  | 0.000 |
| QLD-FN | 391 | Machinery appliances and equipment      | 0.000  | 0.000 |
| QLD-FN | 392 | Miscellaneous manufacturing             | 0.000  | 0.000 |
| QLD-FN | 393 | Electricity supply, gas and water       | 0.000  | 0.000 |
| QLD-FN | 394 | Residential building construction       | 0.000  | 0.000 |
| QLD-FN | 395 | Other construction                      | -0.154 | 0.000 |
| QLD-FN | 396 | Trade                                   | -0.430 | 0.000 |
| QLD-FN | 397 | Accommodation, cafes and restaurants    | 0.000  | 0.000 |
| QLD-FN | 398 | Road transport                          | 0.000  | 0.000 |
| QLD-FN | 399 | Rail and pipeline transport             | 0.000  | 0.000 |
| QLD-FN | 400 | Other transport                         | -0.393 | 0.000 |
| QLD-FN | 401 | Communication services                  | 0.000  | 0.000 |
| QLD-FN | 402 | Finance, property and business services | -0.468 | 0.000 |
| QLD-FN | 403 | Ownership of dwellings                  | 0.000  | 0.000 |
| QLD-FN | 404 | Government administration and defence   | 0.000  | 0.000 |
| QLD-FN | 405 | Education                               | 0.000  | 0.000 |
| QLD-FN | 406 | Health and community services           | 0.000  | 0.000 |
| QLD-FN | 407 | Cultural and recreational services      | 0.000  | 0.000 |
| QLD-FN | 408 | Personal and other services             | 0.000  | 0.000 |
| QLD-NW | 409 | Sheep                                   | 0.000  | 0.000 |
| QLD-NW | 410 | Grains                                  | 0.000  | 0.000 |
| QLD-NW | 411 | Beef cattle                             | 0.000  | 0.000 |
| QLD-NW | 412 | Dairy cattle and pigs                   | 0.000  | 0.000 |
| QLD-NW | 413 | Other agriculture                       | 0.000  | 0.000 |
| QLD-NW | 414 | Sugar cane growing                      | 0.000  | 0.000 |
| QLD-NW | 415 | Forestry and fishing                    | 0.000  | 0.000 |
| QLD-NW | 416 | Coal, oil and gas                       | 0.000  | 0.000 |
| QLD-NW | 417 | Non-ferrous metal ores                  | 0.000  | 0.000 |
| QLD-NW | 418 | Other mining                            | 0.000  | 0.000 |
| QLD-NW | 419 | Food manufacturing                      | 0.000  | 0.000 |
| QLD-NW | 420 | Textiles, clothing and footwear         | 0.000  | 0.000 |
| QLD-NW | 421 | Wood and paper manufacturing            | 0.000  | 0.000 |
| QLD-NW | 422 | Chemicals, petroleum and coal products  | 0.000  | 0.000 |

|        |     |                                         |        |        |
|--------|-----|-----------------------------------------|--------|--------|
| QLD-NW | 423 | Non-metallic mineral products           | 0.000  | 0.000  |
| QLD-NW | 424 | Metals, metal products                  | 0.000  | 0.000  |
| QLD-NW | 425 | Machinery appliances and equipment      | 0.000  | 0.000  |
| QLD-NW | 426 | Miscellaneous manufacturing             | 0.000  | 0.000  |
| QLD-NW | 427 | Electricity supply, gas and water       | 0.000  | 0.000  |
| QLD-NW | 428 | Residential building construction       | 0.000  | 0.000  |
| QLD-NW | 429 | Other construction                      | 0.000  | 0.000  |
| QLD-NW | 430 | Trade                                   | 0.000  | 0.000  |
| QLD-NW | 431 | Accommodation, cafes and restaurants    | 0.000  | 0.000  |
| QLD-NW | 432 | Road transport                          | 0.000  | 0.000  |
| QLD-NW | 433 | Rail and pipeline transport             | 0.000  | 0.000  |
| QLD-NW | 434 | Other transport                         | 0.000  | 0.000  |
| QLD-NW | 435 | Communication services                  | 0.000  | 0.000  |
| QLD-NW | 436 | Finance, property and business services | 0.000  | 0.000  |
| QLD-NW | 437 | Ownership of dwellings                  | 0.000  | 0.000  |
| QLD-NW | 438 | Government administration and defence   | 0.000  | 0.000  |
| QLD-NW | 439 | Education                               | 0.000  | 0.000  |
| QLD-NW | 440 | Health and community services           | 0.000  | 0.000  |
| QLD-NW | 441 | Cultural and recreational services      | 0.000  | 0.000  |
| QLD-NW | 442 | Personal and other services             | 0.000  | 0.000  |
| SA     | 443 | Sheep                                   | -0.044 | 0.000  |
| SA     | 444 | Grains                                  | -0.163 | 0.000  |
| SA     | 445 | Beef cattle                             | -0.126 | 0.000  |
| SA     | 446 | Dairy cattle and pigs                   | 0.000  | 0.000  |
| SA     | 447 | Other agriculture                       | -1.020 | -0.113 |
| SA     | 448 | Sugar cane growing                      | 0.000  | 0.000  |
| SA     | 449 | Forestry and fishing                    | 0.000  | 0.000  |
| SA     | 450 | Coal, oil and gas                       | 0.000  | 0.000  |
| SA     | 451 | Non-ferrous metal ores                  | 0.000  | 0.000  |
| SA     | 452 | Other mining                            | -0.197 | 0.000  |
| SA     | 453 | Food manufacturing                      | -0.692 | 0.000  |
| SA     | 454 | Textiles, clothing and footwear         | 0.000  | 0.000  |
| SA     | 455 | Wood and paper manufacturing            | 0.000  | 0.000  |
| SA     | 456 | Chemicals, petroleum and coal products  | 0.000  | 0.000  |
| SA     | 457 | Non-metallic mineral products           | 0.000  | 0.000  |
| SA     | 458 | Metals, metal products                  | -0.376 | 0.000  |
| SA     | 459 | Machinery appliances and equipment      | -0.628 | -0.189 |
| SA     | 460 | Miscellaneous manufacturing             | 0.000  | 0.000  |
| SA     | 461 | Electricity supply, gas and water       | -0.395 | -0.123 |
| SA     | 462 | Residential building construction       | -0.488 | 0.000  |
| SA     | 463 | Other construction                      | -0.934 | -0.157 |
| SA     | 464 | Trade                                   | -1.215 | -0.290 |
| SA     | 465 | Accommodation, cafes and restaurants    | -0.366 | 0.000  |

|    |     |                                         |        |        |
|----|-----|-----------------------------------------|--------|--------|
| SA | 466 | Road transport                          | -0.817 | 0.000  |
| SA | 467 | Rail and pipeline transport             | 0.000  | 0.000  |
| SA | 468 | Other transport                         | -0.308 | 0.000  |
| SA | 469 | Communication services                  | -0.307 | 0.000  |
| SA | 470 | Finance, property and business services | -0.783 | 0.000  |
| SA | 471 | Ownership of dwellings                  | -0.298 | 0.000  |
| SA | 472 | Government administration and defence   | -0.589 | -0.085 |
| SA | 473 | Education                               | -0.263 | 0.000  |
| SA | 474 | Health and community services           | -0.616 | 0.000  |
| SA | 475 | Cultural and recreational services      | -0.105 | 0.000  |
| SA | 476 | Personal and other services             | 0.000  | 0.000  |
| WA | 477 | Sheep                                   | 0.000  | 0.000  |
| WA | 478 | Grains                                  | -0.116 | 0.000  |
| WA | 479 | Beef cattle                             | -0.030 | 0.000  |
| WA | 480 | Dairy cattle and pigs                   | 0.000  | 0.000  |
| WA | 481 | Other agriculture                       | -0.292 | 0.000  |
| WA | 482 | Sugar cane growing                      | 0.000  | 0.000  |
| WA | 483 | Forestry and fishing                    | 0.000  | 0.000  |
| WA | 484 | Coal, oil and gas                       | -0.482 | -0.930 |
| WA | 485 | Non-ferrous metal ores                  | -0.490 | -0.635 |
| WA | 486 | Other mining                            | -1.399 | -1.298 |
| WA | 487 | Food manufacturing                      | -0.472 | 0.000  |
| WA | 488 | Textiles, clothing and footwear         | 0.000  | 0.000  |
| WA | 489 | Wood and paper manufacturing            | 0.000  | 0.000  |
| WA | 490 | Chemicals, petroleum and coal products  | -0.108 | 0.000  |
| WA | 491 | Non-metallic mineral products           | 0.000  | 0.000  |
| WA | 492 | Metals, metal products                  | -0.662 | -0.138 |
| WA | 493 | Machinery appliances and equipment      | -0.482 | -0.179 |
| WA | 494 | Miscellaneous manufacturing             | 0.000  | 0.000  |
| WA | 495 | Electricity supply, gas and water       | -0.646 | -0.236 |
| WA | 496 | Residential building construction       | -0.854 | -0.247 |
| WA | 497 | Other construction                      | -1.301 | -0.618 |
| WA | 498 | Trade                                   | -1.399 | -0.485 |
| WA | 499 | Accommodation, cafes and restaurants    | -0.773 | 0.000  |
| WA | 500 | Road transport                          | -0.927 | -0.018 |
| WA | 501 | Rail and pipeline transport             | 0.000  | 0.000  |
| WA | 502 | Other transport                         | -0.710 | -0.169 |
| WA | 503 | Communication services                  | -0.436 | -0.048 |
| WA | 504 | Finance, property and business services | -1.159 | -0.229 |
| WA | 505 | Ownership of dwellings                  | -0.495 | 0.000  |
| WA | 506 | Government administration and defence   | -0.727 | -0.012 |
| WA | 507 | Education                               | -0.668 | 0.000  |
| WA | 508 | Health and community services           | -0.647 | 0.000  |

|     |     |                                         |        |       |
|-----|-----|-----------------------------------------|--------|-------|
| WA  | 509 | Cultural and recreational services      | -0.255 | 0.000 |
| WA  | 510 | Personal and other services             | -0.125 | 0.000 |
| TAS | 511 | Sheep                                   | 0.000  | 0.000 |
| TAS | 512 | Grains                                  | 0.000  | 0.000 |
| TAS | 513 | Beef cattle                             | 0.000  | 0.000 |
| TAS | 514 | Dairy cattle and pigs                   | 0.000  | 0.000 |
| TAS | 515 | Other agriculture                       | -0.262 | 0.000 |
| TAS | 516 | Sugar cane growing                      | 0.000  | 0.000 |
| TAS | 517 | Forestry and fishing                    | 0.000  | 0.000 |
| TAS | 518 | Coal, oil and gas                       | 0.000  | 0.000 |
| TAS | 519 | Non-ferrous metal ores                  | 0.000  | 0.000 |
| TAS | 520 | Other mining                            | 0.000  | 0.000 |
| TAS | 521 | Food manufacturing                      | 0.000  | 0.000 |
| TAS | 522 | Textiles, clothing and footwear         | 0.000  | 0.000 |
| TAS | 523 | Wood and paper manufacturing            | 0.000  | 0.000 |
| TAS | 524 | Chemicals, petroleum and coal products  | 0.000  | 0.000 |
| TAS | 525 | Non-metallic mineral products           | 0.000  | 0.000 |
| TAS | 526 | Metals, metal products                  | 0.000  | 0.000 |
| TAS | 527 | Machinery appliances and equipment      | 0.000  | 0.000 |
| TAS | 528 | Miscellaneous manufacturing             | 0.000  | 0.000 |
| TAS | 529 | Electricity supply, gas and water       | 0.000  | 0.000 |
| TAS | 530 | Residential building construction       | 0.000  | 0.000 |
| TAS | 531 | Other construction                      | -0.278 | 0.000 |
| TAS | 532 | Trade                                   | -0.610 | 0.000 |
| TAS | 533 | Accommodation, cafes and restaurants    | 0.000  | 0.000 |
| TAS | 534 | Road transport                          | -0.013 | 0.000 |
| TAS | 535 | Rail and pipeline transport             | 0.000  | 0.000 |
| TAS | 536 | Other transport                         | 0.000  | 0.000 |
| TAS | 537 | Communication services                  | 0.000  | 0.000 |
| TAS | 538 | Finance, property and business services | 0.000  | 0.000 |
| TAS | 539 | Ownership of dwellings                  | 0.000  | 0.000 |
| TAS | 540 | Government administration and defence   | -0.018 | 0.000 |
| TAS | 541 | Education                               | 0.000  | 0.000 |
| TAS | 542 | Health and community services           | -0.183 | 0.000 |
| TAS | 543 | Cultural and recreational services      | 0.000  | 0.000 |
| TAS | 544 | Personal and other services             | 0.000  | 0.000 |
| ACT | 545 | Sheep                                   | 0.000  | 0.000 |
| ACT | 546 | Grains                                  | 0.000  | 0.000 |
| ACT | 547 | Beef cattle                             | 0.000  | 0.000 |
| ACT | 548 | Dairy cattle and pigs                   | 0.000  | 0.000 |
| ACT | 549 | Other agriculture                       | 0.000  | 0.000 |
| ACT | 550 | Sugar cane growing                      | 0.000  | 0.000 |
| ACT | 551 | Forestry and fishing                    | 0.000  | 0.000 |

|     |     |                                         |        |        |
|-----|-----|-----------------------------------------|--------|--------|
| ACT | 552 | Coal, oil and gas                       | 0.000  | 0.000  |
| ACT | 553 | Non-ferrous metal ores                  | 0.000  | 0.000  |
| ACT | 554 | Other mining                            | 0.000  | 0.000  |
| ACT | 555 | Food manufacturing                      | 0.000  | 0.000  |
| ACT | 556 | Textiles, clothing and footwear         | 0.000  | 0.000  |
| ACT | 557 | Wood and paper manufacturing            | 0.000  | 0.000  |
| ACT | 558 | Chemicals, petroleum and coal products  | 0.000  | 0.000  |
| ACT | 559 | Non-metallic mineral products           | 0.000  | 0.000  |
| ACT | 560 | Metals, metal products                  | 0.000  | 0.000  |
| ACT | 561 | Machinery appliances and equipment      | 0.000  | 0.000  |
| ACT | 562 | Miscellaneous manufacturing             | 0.000  | 0.000  |
| ACT | 563 | Electricity supply, gas and water       | 0.000  | 0.000  |
| ACT | 564 | Residential building construction       | 0.000  | 0.000  |
| ACT | 565 | Other construction                      | -0.124 | 0.000  |
| ACT | 566 | Trade                                   | -0.134 | 0.000  |
| ACT | 567 | Accommodation, cafes and restaurants    | 0.000  | 0.000  |
| ACT | 568 | Road transport                          | 0.000  | 0.000  |
| ACT | 569 | Rail and pipeline transport             | 0.000  | 0.000  |
| ACT | 570 | Other transport                         | 0.000  | 0.000  |
| ACT | 571 | Communication services                  | 0.000  | 0.000  |
| ACT | 572 | Finance, property and business services | -0.233 | 0.000  |
| ACT | 573 | Ownership of dwellings                  | 0.000  | 0.000  |
| ACT | 574 | Government administration and defence   | 0.000  | -0.440 |
| ACT | 575 | Education                               | 0.000  | 0.000  |
| ACT | 576 | Health and community services           | 0.000  | 0.000  |
| ACT | 577 | Cultural and recreational services      | 0.000  | 0.000  |
| ACT | 578 | Personal and other services             | 0.000  | 0.000  |
| NT  | 579 | Sheep                                   | 0.000  | 0.000  |
| NT  | 580 | Grains                                  | 0.000  | 0.000  |
| NT  | 581 | Beef cattle                             | 0.000  | 0.000  |
| NT  | 582 | Dairy cattle and pigs                   | 0.000  | 0.000  |
| NT  | 583 | Other agriculture                       | 0.000  | 0.000  |
| NT  | 584 | Sugar cane growing                      | 0.000  | 0.000  |
| NT  | 585 | Forestry and fishing                    | 0.000  | 0.000  |
| NT  | 586 | Coal, oil and gas                       | 0.000  | 0.000  |
| NT  | 587 | Non-ferrous metal ores                  | 0.000  | 0.000  |
| NT  | 588 | Other mining                            | 0.000  | 0.000  |
| NT  | 589 | Food manufacturing                      | 0.000  | 0.000  |
| NT  | 590 | Textiles, clothing and footwear         | 0.000  | 0.000  |
| NT  | 591 | Wood and paper manufacturing            | 0.000  | 0.000  |
| NT  | 592 | Chemicals, petroleum and coal products  | 0.000  | 0.000  |
| NT  | 593 | Non-metallic mineral products           | 0.000  | 0.000  |
| NT  | 594 | Metals, metal products                  | 0.000  | 0.000  |



|     |     |                                         |        |       |
|-----|-----|-----------------------------------------|--------|-------|
| NT  | 595 | Machinery appliances and equipment      | 0.000  | 0.000 |
| NT  | 596 | Miscellaneous manufacturing             | 0.000  | 0.000 |
| NT  | 597 | Electricity supply, gas and water       | 0.000  | 0.000 |
| NT  | 598 | Residential building construction       | 0.000  | 0.000 |
| NT  | 599 | Other construction                      | -0.162 | 0.000 |
| NT  | 600 | Trade                                   | -0.129 | 0.000 |
| NT  | 601 | Accommodation, cafes and restaurants    | 0.000  | 0.000 |
| NT  | 602 | Road transport                          | 0.000  | 0.000 |
| NT  | 603 | Rail and pipeline transport             | 0.000  | 0.000 |
| NT  | 604 | Other transport                         | 0.000  | 0.000 |
| NT  | 605 | Communication services                  | 0.000  | 0.000 |
| NT  | 606 | Finance, property and business services | 0.000  | 0.000 |
| NT  | 607 | Ownership of dwellings                  | 0.000  | 0.000 |
| NT  | 608 | Government administration and defence   | -0.137 | 0.000 |
| NT  | 609 | Education                               | 0.000  | 0.000 |
| NT  | 610 | Health and community services           | -0.031 | 0.000 |
| NT  | 611 | Cultural and recreational services      | 0.000  | 0.000 |
| NT  | 612 | Personal and other services             | 0.000  | 0.000 |
| ROW | 613 | ROW                                     | 0.000  | 0.000 |

## SI 6: References

- Agence-France-Presse: Debbie's devastation: First victims of ferocious storm tell of damage. In: Agence-France-Presse, 28 March, 2017.
- Australian Government: Budget Strategy and Outlook 2011-12. Canberra, 2011.
- BBC News: Cyclone Debbie: Thousands evacuate in Queensland, Australia. In: BBC News, 2017.
- Carruthers, P.: Eight council areas get disaster relief due to Cyclone Debbie. In: The Morning Bulletin, 2017. Courier Mail, 2017.
- Cummins, A.: Queensland cyclone Debbie prompts evacuations in Australia. In: WFMZ-TV, 2017.
- Department of the Prime Minister and Cabinet: Best Practice Regulation Guidance Note Value of statistical life. Canberra, 2014.
- Donoughue, P.: Cyclone Debbie northern NSW braces for major flooding. In: ABC News, 2017.
- Emerick, C.: Cyclone Debbie caused over \$100m in damages for Australian growers In: Fresh Plaza, 2017.
- Flaherty, J.: Cyclone Debbie – Overall Damage Bill and Economic Impact. In: CCIQ, 2017.
- Gillman, O.: Debbie's disastrous aftermath: Incredible pictures show the billion-dollar clean up underway after Cyclone Debbie ravaged Australia's east coast - as devastated residents arrive home. In: Daily Mail Australia, 2017.
- Cyclone Debbie aftermath: Business owners turn on Malcolm Turnbull as he tours flood ravaged Lismore, Available online: <http://www.dailytelegraph.com.au/business/cyclone-debbie-aftermath-business-owners-turn-on-malcolm-turnbull-as-he-tours-flood-ravaged-lismore/news-story/b09f194fa876d0cabd623889172cedc6>: <http://www.dailytelegraph.com.au/business/cyclone-debbie-aftermath-business-owners-turn-on-malcolm-turnbull-as-he-tours-flood-ravaged-lismore/news-story/b09f194fa876d0cabd623889172cedc6>, access: 15 June, April 3, 2017 1:36pm.
- Lismore floods: Business owners without insurance hit hardest, could be forced to close forever, Available online: <http://www.dailytelegraph.com.au/news/nsw/lismore-floods-business-owners-without-insurance-hit-hardest-could-be-forced-to-close-forever/news-story/51a52a4f328436cb3790defd2ce8280d>: <http://www.dailytelegraph.com.au/business/cyclone-debbie-aftermath-business-owners-turn-on-malcolm-turnbull-as-he-tours-flood-ravaged-lismore/news-story/b09f194fa876d0cabd623889172cedc6>, access: 15 June, April 9, 2017 12:00am.
- Honan, K.: Flood-affected farmers in New South Wales call for disaster funding three weeks on. In: ABC News, 2017.
- John McCarthy, and Vogler, S.: Queensland. Cyclone Debbie economic impact. In: Courier Mail, 2017.
- Killalea, D., Reynolds, E., and Palin, M.: Grim warning as Debbie bears down: 'This is a monster cyclone'. In: NewsComAu, 2017.
- Neville, M.: Cyclone Debbie's \$6 million impact on dairy. In: QDO, 12 April, 2017.
- North Queensland Bulk Ports Corporation: NQBP ports prepared for Tropical Cyclone Debbie, 2017.
- O'Brien, C.: Cyclone Debbie recovery costs to hit Queensland budget bottom line. In: ABC News, 2017.
- Public-Private Partnership in Infrastructure Resource Centre: Central Queensland Coal Network - Model Operator Access Agreement Coal, World Bank Group, 2016.
- QFF: Cyclone Debbie Agricultural Impact – 6 April 2017. 2017.
- Queensland Government: The State Recovery Plan 2017-2019. Operation Queensland Recovery. Working to recover, reconnect and rebuild more resilient Queensland communities following the effects of Severe Tropical Cyclone Debbie. Queensland Government, Brisbane, 2017.
- Robertson, J.: Cyclone Debbie: Queensland reels at the scale of destruction In: The Guardian, Australia, 2017.
- Serapio, M.: With Australia's supply disrupted by Cyclone Debbie, coal buyers race elsewhere. In: Sydney Morning Herald, 2017.
- The Courier Mail: Queensland cyclone: Debbie damage to cost local sugar industry \$150 million. In: Courier Mail, 2017.
- Tourism Research Australia: Tourism Businesses in Australia, June 2011 to June 2015, Tourism Research Australia, Canberra, 2016.
- Underwriter, C.: Insured losses from Cyclone Debbie reach AU\$306 million: Insurance Council of Australia In: Canadian Underwriter, 4 April 2017.
- Young, M., Chang, C., Reynolds, E., and Craw, V.: Cyclone Debbie's full wrath is revealed. In: NewsComAu, 2017.
